# Supplementary material
Source: ML conference proceedings conference paper supplement (https://proceedings.neurips.cc/paper_files/paper/2023/hash/5e809ba53f34d9170386ebfc8b60300f-Abstract.html)
Supplement: Supplementary file 1 [file 5e809ba53f34d9170386ebfc8b60300f-Supplemental-Conference.pdf]

---

# Riemannian stochastic optimization methods avoid strict saddle points

---

Anonymous Author(s)

Affiliation

Address

email

## Abstract

1 Many modern machine learning applications – from online principal component  
2 analysis to covariance matrix identification and dictionary learning – can be formu-  
3 lated as minimization problems on Riemannian manifolds, typically solved with  
4 a Riemannian stochastic gradient method (or some variant thereof). However, in  
5 many cases of interest, the resulting minimization problem is *not* geodesically  
6 convex, so the convergence of the chosen solver to a desirable solution - i.e., a  
7 local minimizer - is by no means guaranteed. In this paper, we study precisely  
8 this question, that is, whether stochastic Riemannian optimization algorithms are  
9 guaranteed to avoid saddle points with probability 1. For generality, we study  
10 a family of retraction-based methods which, in addition to having a potentially  
11 much lower per-iteration cost relative to Riemannian gradient descent, include  
12 other widely used algorithms, such as natural policy gradient methods and mirror  
13 descent in ordinary convex spaces. In this general setting, we show that, under  
14 mild assumptions for the ambient manifold and the oracle providing gradient in-  
15 formation, the policies under study avoid strict saddle points / submanifolds with  
16 probability 1, from any initial condition. This result provides an important sanity  
17 check for the use of gradient methods on manifolds as it shows that, almost always,  
18 the end state of a stochastic Riemannian algorithm can only be a local minimizer.

## 19 1 Introduction

20 Modern machine learning systems have achieved remarkable success in the efficient optimization  
21 of highly non-convex functions using straightforward *Euclidean* techniques like stochastic gradient  
22 descent. A widely accepted hypothesis to explain this phenomenon is that, when the learning system  
23 under study – e.g., a neural network – possesses a high level of expressiveness, local minimizers are  
24 essentially as good as global ones [19, 33]; by this token, a training algorithm can attain satisfactory  
25 performance by simply evading *saddle points* of the model’s loss surface.

26 This observation has sparked a far-reaching research thread examining the behavior of various  
27 algorithms around saddle points in non-convex functions. Informally, these studies aim to tackle two  
28 fundamental questions:

29 Q<sub>1</sub>: When does a given scheme, like stochastic gradient descent, avoid saddle points?

30 Q<sub>2</sub>: Can we *augment* a given scheme so that it efficiently escapes saddle points?

31 In the above, Q<sub>1</sub> focuses on *explaining* the empirical success of commonly used schemes, while the  
32 resolution of Q<sub>2</sub> usually revolves around proposing new schemes with desirable escape guarantees.  
33 These complementary perspectives have been extensively studied over the past decade, leading to a  
34 fairly complete understanding of how and when a Euclidean (stochastic) algorithm escapes saddle  
35 points, see e.g., [26, 27, 39, 40, 44, 50, 51] and references therein.

36 In parallel to the above, the recent surge of interest in Riemannian optimization has prompted a closer  
 37 examination *Riemannian* methods, thereby motivating an extension of  $Q_1$  and  $Q_2$  to a manifold setting  
 38 – itself due to a wide range of breakthrough applications to machine learning and data science, from  
 39 natural language processing, and signal processing to dictionary learning and robotics [45, 49, 61, 62].  
 40 As a result, there is an increasing demand for a comprehensive exploration of various spaces, such as  
 41 the  $d$ -dimensional torus, Grassmannian or Stiefel manifolds, and hyperbolic spaces.

42 Unfortunately, in a proper Riemannian setting, only  $Q_2$  has received sufficient scrutiny thus far. Recent  
 43 works by Criscitiello and Boumal [20] and Sun et al. [63] have shown that standard Riemannian  
 44 deterministic algorithms can be augmented by the injection of an infinitesimal amount of noise  
 45 (proportional to the method’s desired accuracy), to achieve comparable escape guarantees in terms of  
 46 oracle complexity as the corresponding Euclidean methods [28]. To the best of our knowledge, all  
 47 existing results for  $Q_1$  concern *deterministic* methods [26, 39, 40, 50] which are significantly limited  
 48 in scope in large-scale machine learning applications, due to their prohibitively high per-iteration cost.

49 **Our results and techniques.** In view of the above, our paper aims to provide a general answer  
 50 to  $Q_1$  for a broad class of Riemannian stochastic optimization methods – including Riemannian  
 51 stochastic gradient descent, its retraction-based and/or optimistic variants, etc. Concretely, we focus  
 52 throughout on a flexible template of *Riemannian Robbins–Monro* (RRM) schemes [32, 56], which  
 53 readily includes the specific algorithms of interest mentioned above, but also a range of Euclidean  
 54 methods that can be analyzed efficiently from a Riemannian viewpoint.

55 Informally, our main result may be stated as follows:

56 *Under any stochastic Riemannian Robbins–Monro method, the probability of*  
 57 *converging to a strict saddle point (or a submanifold thereof) is zero.*

58 This statement provides firm grounds for accepting the output of a stochastic Riemannian optimization  
 59 method as valid, as it shows that saddle points are avoided with probability 1 (we recall here that  
 60 a strict saddle manifold is a set of critical points each of which has at least one negative Hessian  
 61 eigenvalue). Such manifolds include ridge hypersurfaces and other connected sets of non-isolated  
 62 saddle points that are common in the loss landscapes of high-dimensional machine learning models,  
 63 so this result has significant cutting power in this regard.

64 In the context of stochastic methods, our result builds on a series of foundational results by Pemantle  
 65 [51] and Brandière and Duflo [18] who focused on *hyperbolic traps* (isolated saddle points with  
 66 invertible Hessian). These results were subsequently extended by Benaïm and Hirsch [10] to  
 67 a more general class of unstable *sets*, but this analysis remained grounded in a flat, Euclidean  
 68 setting. The connecting tissue of our analysis with these works is the notion of an asymptotic  
 69 pseudotrajectory (APT), which allows us to couple the long-run behavior of discrete-time RRM  
 70 methods to that of an associated Riemannian gradient flow. [This discrete-to-continuous comparison  
 71 is crucial for our analysis in order to apply center stable manifold techniques [60] to the RRM  
 72 framework.] However, this comes at a significant cost, as establishing the APT property in a  
 73 Riemannian setting is a highly challenging affair. To achieve this, we employ a set of techniques  
 74 recently developed by [31] which allow us to make this comparison precise and establish the desired  
 75 avoidance result.

## 76 2 Setup and preliminaries

77 We begin with a brief overview of some basic definitions from Riemannian geometry and optimiza-  
 78 tion, solely intended to set notation and terminology; our presentation roughly follows the masterful  
 79 account of Lee [41, 42], to which we refer the reader for a comprehensive introduction to the topic.

80 Let  $\mathcal{M}$  be a  $d$ -dimensional, geodesically complete Riemannian manifold. Throughout the sequel, the  
 81 tangent space to  $\mathcal{M}$  at a point  $x \in \mathcal{M}$  will be denoted by  $\mathcal{T}_x\mathcal{M}$ , and we will write  $\dot{\gamma}(t) \in \mathcal{T}_{\gamma(t)}\mathcal{M}$   
 82 for the velocity vector to a smooth curve  $\gamma: \mathbb{R} \rightarrow \mathcal{M}$  at time  $t \in \mathbb{R}$ . We will also write  $\langle \cdot, \cdot \rangle_x$  for the  
 83 metric at  $x \in \mathcal{M}$ ,  $\|\cdot\|_x$  for the associated norm, and  $\text{dist}(\cdot, \cdot)$  for the induced distance function on  $\mathcal{M}$ ,  
 84 the latter being defined via the minimization of the length functional  $\mathcal{L}[\gamma] = \int \|\dot{\gamma}(t)\|_{\gamma(t)} dt$ .

85 Given a point  $x \in \mathcal{M}$  and a tangent vector  $z \in \mathcal{T}_x\mathcal{M}$ , the (necessarily unique) geodesic emanating  
 86 from  $x$  along  $z$  will be denoted by  $\gamma_z$ , and we define the exponential map at  $x$  as  $\exp_x(z) = \gamma_z(1)$  for  
 87 all  $z \in \mathcal{T}_x\mathcal{M}$  (recall here that  $\mathcal{M}$  is assumed complete, so this map is well-defined for all  $x \in \mathcal{M}$  and

88 all  $z \in \mathcal{T}_x \mathcal{M}$ ). Whenever well-defined, the inverse of  $\exp_x$  will be written as  $\log_x : \mathcal{M} \rightarrow \mathcal{T}_x \mathcal{M}$ , with  
 89 the understanding that the domain of  $\log_x$  is actually the largest neighborhood of  $x \in \mathcal{M}$  on which  
 90 the restriction of  $\exp_x$  is a (global) diffeomorphism; by definition, we have  $\log_x(\exp_x(z)) = z$  for all  
 91  $z$  for which the relevant quantities are well-defined. Finally, given a pair of points  $x, x' \in \mathcal{M}$  and a  
 92 tangent vector  $z \in \mathcal{T}_x \mathcal{M}$ , we will write  $\Gamma_{x \rightarrow x'}(z)$  for the vector obtained by parallel transporting  $z$   
 93 along any minimizing geodesic connecting  $x$  and  $x'$ .

94 In this general context, we will be interested in solving the Riemannian optimization problem

$$\text{minimize}_{x \in \mathcal{M}} f(x) \quad (\text{Opt})$$

95 for some smooth *objective function*  $f : \mathcal{M} \rightarrow \mathbb{R}$  (the degree of smoothness of  $f$  will be assumed to  
 96 be at least  $C^2$  throughout). We will also respectively write

$$v(x) := -\text{grad}f(x) \quad \text{and} \quad H(x) := \text{Hess}(f(x)) \quad (1)$$

97 for the *negative (Riemannian) gradient* and the *(Riemannian) Hessian* of  $f$  at  $x$ . In terms of regularity,  
 98 we will also assume throughout that  $v$  is (geodesically)  $L$ -Lipschitz, i.e., for all  $x, x' \in \mathcal{M}$ , we have

$$\|\Gamma_{x \rightarrow x'}(v(x)) - v(x')\|_{x'} = \|v(x) - \Gamma_{x' \rightarrow x}(v(x'))\|_x \leq L \text{dist}(x, x'). \quad (2)$$

99 Finally, in terms of solutions of (Opt), we will focus on the avoidance of *strict saddle points* of  $f$ , i.e.,  
 100 points  $\hat{x} \in \mathcal{M}$  for which

$$v(\hat{x}) = 0 \quad \text{and} \quad \lambda_{\min}(H(\hat{x})) < 0 \quad (3)$$

101 where  $\lambda_{\min}$  denotes the minimum eigenvalue of the tensor in question. We will also say that a smooth  
 102 compact component of critical points of  $f$  is a *strict saddle manifold* if there exist constants  $c_{\pm} > 0$   
 103 such that all negative eigenvalues of  $H(\hat{x})$ ,  $\hat{x} \in \mathcal{S}$ , are bounded from above by  $-c_- < 0$ , and any  
 104 positive eigenvalues (if they exist) are bounded from below by  $c_+ > 0$ .

105 To differentiate the above from the Euclidean setting, when  $\mathcal{M}$  is a real space equipped with the  
 106 Euclidean metric, we will instead write  $\nabla f$  and  $\nabla^2 f$  for the (ordinary) gradient and Hessian matrix  
 107 of  $f$ . In this case, as is customary, we will not distinguish between primal and dual vectors.

### 108 3 Core algorithmic framework

109 For generality, our avoidance analysis will be carried out in an abstract stochastic approximation  
 110 framework which includes several popular Riemannian optimization algorithms – from ordinary  
 111 Riemannian (stochastic) gradient descent, to its retraction-based variants, optimistic methods, etc.  
 112 For concreteness, we start with the general template below, and we present a (nonexhaustive!) series  
 113 of representative examples right after.

114 **3.1. The Riemannian Robbins–Monro template.** The *Riemannian Robbins–Monro* (RRM) frame-  
 115 work that we will consider for solving (Opt) is an iterative family of methods which directly extends  
 116 the seminal stochastic approximation scheme of Robbins and Monro [56] to a manifold setting by  
 117 replacing vector addition with the Riemannian exponential. Roughly following [31], we will focus  
 118 on the abstract update rule

$$X_{n+1} = \exp_{X_n}(\gamma_n \hat{v}_n) \quad (\text{RRM})$$

119 where

- 120 1.  $X_n \in \mathcal{M}$  denotes the state of the algorithm at each iteration  $n = 1, 2, \dots$
- 121 2.  $\hat{v}_n \in \mathcal{T}_{X_n} \mathcal{M}$  is a surrogate for the (negative) gradient  $v(X_n)$  of  $f$  at  $X_n$  (defined in detail below).
- 122 3.  $\gamma_n > 0$  is the method’s step-size (discussed in Section 4).

123 In the above, the defining element of (RRM) is the sequence of “surrogate gradients”  $\hat{v}_n$ ,  $n = 1, 2, \dots$ ,  
 124 so this will be our first object of interest. Formally, letting  $\mathcal{F}_n$  denote the history of  $X_n$  up to stage  $n$   
 125 (inclusive), we will write

$$\hat{v}_n = v(X_n) + U_n + b_n \quad (4)$$

126 where

$$U_n = \hat{v}_n - \mathbb{E}[\hat{v}_n | \mathcal{F}_n] \quad \text{and} \quad b_n = \mathbb{E}[\hat{v}_n | \mathcal{F}_n] - v(X_n) \quad (5)$$

127 respectively denote the *random error* and the *offset* of  $\hat{v}_n$  relative to  $v(X_n)$ . It will also be convenient  
 128 to introduce the *total error*  $W_n = \hat{v}_n - v(X_n) = U_n + b_n$ , which captures both random and systematic  
 129 fluctuations in  $\hat{v}_n$ , and which measures the total deviation of  $\hat{v}_n$  from  $v(X_n)$ .

130 Two points are worth noting here: First,  $\hat{v}_n$  is *not* adapted to  $\mathcal{F}_n$ , so  $U_n$  is random relative to  $\mathcal{F}_n$ ;  
 131 on the other hand,  $b_n$  is  $\mathcal{F}_n$ -measurable, so it is deterministic relative to  $\mathcal{F}_n$ . This brings us to the  
 132 second important point regarding  $\hat{v}_n$ : given the systematic offset term  $b_n$  in  $\hat{v}_n$ , the latter should *not*  
 133 *be seen* as the output of a gradient oracle for  $v(X_n)$ . In particular,  $b_n$  is intended to capture possible  
 134 corrective terms, deviations from the exponential mapping, different algorithmic update structures  
 135 (such as optimism), etc. We make this distinction precise below.

136 **3.2. Specific algorithms and examples.** In the series of examples that follow, we will assume that  
 137 the optimizer can access  $f$  via a *stochastic first-order oracle* (SFO) returning noisy gradients of  $f$  at  
 138 the evaluation point. Formally, following Nesterov [47], an SFO is a black-box mechanism which,  
 139 when queried at  $x \in \mathcal{M}$ , returns a (negative) stochastic gradient of the form

$$V(x; \theta) = v(x) + \text{err}(x; \theta) \quad (\text{SFO})$$

140 where the *seed*  $\theta \in \Theta$  is a random variable taking values in some measurable space  $\Theta$ , and  $\text{err}(x; \theta)$   
 141 is an umbrella error term capturing all sources of uncertainty in the model.

142 The archetypal example of an SFO occurs when  $f$  is itself a stochastic expectation of the form  
 143  $f(x) = \mathbb{E}[F(x; \theta)]$  for some random function  $F: \mathcal{M} \times \Theta \rightarrow \mathbb{R}$  – the so-called *stochastic optimiza-*  
 144 *tion* framework. In this case,  $V$  is typically given by  $V(x; \theta) = -\text{grad}_x F(x; \theta)$ , so, under standard  
 145 assumptions for exchanging differentiation and expectation, we have  $\mathbb{E}[V(x; \theta)] = v(x)$ . Extrapolat-  
 146 ing from this basic framework, our only assumption for the moment will be that  $\mathbb{E}[\text{err}(x; \theta)] = 0$ ; for  
 147 a detailed discussion of the required assumptions for (SFO), see Section 4.

148 In practice, (SFO) will be queried repeatedly at a sequence of states  $X_n, n = 1, 2, \dots$ , with a different  
 149 random seed  $\theta_n$  drawn i.i.d. from  $\Theta$ . In this manner, we obtain the following specific algorithms as  
 150 special cases of (RRM):

151 **Algorithm 1** (Riemannian stochastic gradient descent). Following Bonnabel [15], the *Riemannian*  
 152 *stochastic gradient descent* (RSGD) algorithm queries (SFO) at  $X_n$  and proceeds as

$$X_{n+1} = \exp_{X_n}(\gamma_n V(X_n; \theta_n)). \quad (\text{RSGD})$$

153 As such, (RSGD) can be seen as an RRM scheme with  $\hat{v}_n = V(X_n; \theta_n)$  or, equivalently,  $U_n =$   
 154  $\text{err}(X_n; \theta_n)$  and  $b_n = 0$ .  $\blacklozenge$

155 A key factor limiting the applicability of (RSGD) is that the exponential map  $\exp_{X_n}(\cdot)$  could be  
 156 prohibitively expensive to compute in practice, even for relatively low-dimensional manifolds. On  
 157 that account, a popular alternative to (RSGD) is to employ a *retraction map* [2, 17], that is, a smooth  
 158 mapping  $\mathcal{R}: \mathcal{TM} \rightarrow \mathcal{M}$  that agrees with the exponential map up to first order, namely

$$\mathcal{R}_x(0) = x \quad \text{and} \quad \left. \frac{d}{dt} \right|_{t=0} \mathcal{R}_x(tz) = z \quad \text{for all } (x, z) \in \mathcal{TM}. \quad (\text{Rtr})$$

159 With this machinery in hand, we obtain the following retraction-based variant of (RSGD):

160 **Algorithm 2** (Retraction-based stochastic gradient descent). By replacing the exponential map in  
 161 (RSGD) with a retraction, we obtain the *retraction-based stochastic gradient descent* scheme

$$X_{n+1} = \mathcal{R}_{X_n}(\gamma_n V(X_n; \theta_n)). \quad (\text{Rtr-SGD})$$

162 This algorithm does not seem immediately related to the RRM template – and, indeed, the whole  
 163 point of introducing a retraction was to get rid of the exponential map in (RRM). The expressive  
 164 power of (RRM) can be seen in the fact that, despite this apparent disconnect, (Rtr-SGD) can be  
 165 expressed as a special case of (RRM) in a fairly straightforward fashion.

166 To do so, define the “forward-backward” gradient mapping

$$\hat{v}_n := \frac{1}{\gamma_n} \log_{X_n}(\mathcal{R}_{X_n}(\gamma_n V(X_n; \theta_n))) \quad (6)$$

167 with the proviso that the Riemannian logarithm in (6) is well-defined (we discuss the conditions under  
 168 which this holds later in the paper). Under this definition, (Rtr-SGD) can be recast as a special case  
 169 of (RRM) by running the latter with the surrogate gradient sequence  $\hat{v}_n$  of Eq. (6). To streamline our  
 170 presentation, we defer the discussion about the inherent error  $W_n = \hat{v}_n - v(X_n)$  to Appendix A.  $\blacklozenge$

171 As we mentioned before, retraction-based algorithms typically exhibit significantly lower per-iteration  
172 complexity compared to geodesic methods, resulting in their remarkable success in practical machine  
173 learning applications [2, 17]. In addition, as we show below, the use of a retraction mapping allows  
174 us to provide a unified perspective for several classical algorithms which, at first sight, might seem  
175 completely unrelated. An important example is provided by the (stochastic) *mirror descent* (MD)  
176 family of algorithms [46]:

177 **Algorithm 3** (Stochastic mirror descent). Let  $\mathcal{M}$  be an open convex subset of  $\mathbb{R}^M$  and let  $h: \mathcal{M} \rightarrow \mathbb{R}$   
178 be a  $C^2$ -smooth, strongly convex *Legendre function* on  $\mathcal{M}$ , that is,  $\|\nabla h(x)\| \rightarrow \infty$  whenever  
179  $x \rightarrow \text{bd}(\mathcal{M})$  [cf. 57, Chap. 26]. Then, the *stochastic mirror descent* (SMD) algorithm iterates as

$$X_{n+1} = \mathcal{P}_{X_n}(\gamma_n V(X_n; \theta_n)) \quad (\text{SMD})$$

180 where  $V(X_n; \theta_n)$  is the output of an SFO query for  $\nabla f(X_n)$  at  $X_n$ , and  $\mathcal{P}: \mathcal{M} \times \mathbb{R}^M \rightarrow \mathcal{M}$  is the  
181 so-called *prox-mapping* associated to  $h$  [5–7, 29], i.e.,

$$\mathcal{P}_x(y) = \arg \max_{x' \in \mathcal{M}} \{\langle \nabla h(x) + y, x' \rangle - h(x')\} \quad \text{for all } x \in \mathcal{M}, y \in \mathbb{R}^M. \quad (7)$$

182 where  $\langle \cdot, \cdot \rangle$  stands for the ordinary Euclidean inner product in  $\mathbb{R}^M$ .

183 Now, even though the notation in (SMD) is reminiscent of (Rtr-SGD), the definition (7) of  $\mathcal{P}$  does not  
184 bear any resemblance to a geodesic exponential or a retraction – and, indeed, its origins are starkly  
185 different. However, as we show below,  $\mathcal{P}$  can indeed be seen as a retraction relative to a specific  
186 Riemannian structure on  $\mathcal{M}$ , namely the *Hessian Riemannian* (HR) metric associated to  $h$  [3, 22].

187 To make this precise, the first step is to note that the basic recursive structure  $x^+ = \mathcal{P}_x(y)$  of (SMD)  
188 can be rewritten as

$$x^+ = \mathcal{P}_x(y) = \nabla h^*(\nabla h(x) + y) \quad (8)$$

189 where  $h^*(y) = \max_{x \in \mathcal{M}} \{\langle y, x \rangle - h(x)\}$  denotes the convex conjugate of  $h$ , and we have used  
190 Danskin’s theorem [59] to write  $\arg \max_{x \in \mathcal{M}} \{\langle y, x \rangle - h(x)\} = \nabla h^*(y)$ . Then, if we endow  $\mathcal{M}$  with  
191 the Hessian Riemannian metric  $g(x) = \nabla^2 h(x)$ , the Riemannian gradient of  $f$  relative to  $g$  becomes  
192  $\text{grad} f(x) = [\nabla^2 h(x)]^{-1} \nabla f(x)$ , and, more generally, given a cotangent (dual) vector  $y$  to  $\mathcal{M}$  at  $x$ ,  
193 the corresponding tangent (primal) vector will be  $z = g(x)^{-1} y = [\nabla^2 h(x)]^{-1} y$ . In view of this, by  
194 inverting the relation  $z = g(x)^{-1} y$ , the abstract mirror descent recursion (8) can be rewritten as

$$x^+ = \mathcal{R}_x(z) := \mathcal{P}_x(g(x)z). \quad (9)$$

195 To proceed, consider the curve

$$\gamma(t) = \mathcal{R}_x(tz) = \mathcal{P}_x(tg(x)z) = \nabla h^*(\nabla h(x) + tg(x)z), \quad (10)$$

196 so, by definition,  $\gamma(0) = x$ . In addition, by a direct differentiation, we readily obtain

$$\dot{\gamma}(0) = \nabla^2 h^*(\nabla h(x)) g(x) z = z \quad (11)$$

197 where we used the standard identity  $\nabla^2 h^*(\nabla h(x)) = [\nabla^2 h(x)]^{-1}$  [7, 58]. This shows that the map  
198  $\mathcal{R}_x(z) = \mathcal{P}_x(g(x)z)$  is, in fact, a *retraction*, so (SMD) can be seen as a special case of (Rtr-SGD) –  
199 and hence, of the general stochastic approximation template (RRM). ♦

200 *Remark.* Even though elements of the above ideas are implicit in previous works on mirror descent  
201 and Hessian Riemannian metrics [3, 14, 55], to the best of our knowledge, this is the first time that  
202 (SMD) is formalized as a retraction-based (Hessian) Riemannian scheme. ♦

203 **Algorithm 4** (Riemannian optimistic gradient). Moving forward, an important algorithm for solving  
204 online optimization problems and games is the so-called optimistic gradient method – originally  
205 pioneered by Popov [53] and subsequently popularized by Rakhlin and Sridharan [54]. In the  
206 Euclidean case, this method introduces an interim, “optimistic” correction to gradient dynamics and  
207 updates as

$$\begin{aligned} X_n^+ &= X_n + \gamma_n V(X_{n-1}^+; \theta_{n-1}) \\ X_{n+1} &= X_n + \gamma_n V(X_n^+; \theta_n) \end{aligned} \quad (\text{OG})$$

208 where, as usual,  $V$  is an SFO for the (negative) gradient  $\nabla f$  of  $f$ . This idea can then be directly  
209 transported to a manifold setting [31], leading to the *Riemannian optimistic gradient* method

$$\begin{aligned} X_n^+ &= \exp_{X_n}(\gamma_n V(X_{n-1}^+; \theta_{n-1})), \\ X_{n+1} &= \exp_{X_n}(\Gamma_{X_n^+ \rightarrow X_n}(\gamma_n V(X_n^+; \theta_n))). \end{aligned} \quad (\text{ROG})$$

210 Importantly, the recursion (ROG) may be seen as a special case of (RRM) by setting  $\hat{v}_n = (1/\gamma_n) \cdot$   
211  $\Gamma_{X_n^+ \rightarrow X_n}(\gamma_n V(X_n^+; \theta_n))$  or, equivalently  $U_n = \Gamma_{X_n^+ \rightarrow X_n}(\text{err}(X_n^+; \theta_n))$  and  $b_n = \Gamma_{X_n^+ \rightarrow X_n}(v(X_n^+)) -$   
212  $v(X_n)$ . We defer the details of this calculation to the Appendix A. ♦

213 **Algorithm 5** (Natural gradient descent). Our last example concerns the influential *natural gradient*  
 214 *descent* (NGD) method of Amari [4], a stochastic optimization scheme for Euclidean spaces, but  
 215 adapted to the local geometry defined by a strictly convex function  $h$ . Specifically, NGD queries an  
 216 SFO and proceeds as

$$X_{n+1} = X_n - \gamma_n(\text{grad}f(X_n) + \text{err}(X_n; \theta_n)) \quad (\text{NGD})$$

217 where  $\text{grad}f(x) := [\nabla^2 h(x)]^{-1} \nabla f(x)$  denotes the Riemannian gradient of  $f$  relative to Hessian  
 218 Riemannian metric  $g(x) = \nabla h^2(x)$  on  $\mathbb{R}^M$ . It is well known that (NGD) can be seen as a retraction-  
 219 based Riemannian scheme [15], and may thus be integrated directly within the framework of (RRM);  
 220 we defer the details to Appendix A. Importantly, (NGD) also includes the celebrated *natural policy*  
 221 *gradient* [30] which plays an important role in reinforcement learning.  $\blacklozenge$

222 The above examples have been chosen to illustrate a range of different update mechanisms that can be  
 223 integrated within the general algorithmic template provided by (RRM). Of course, it is not possible  
 224 to be exhaustive but, for illustration purposes, we provide some more examples in the Appendix A.

## 225 4 Analysis and results

226 We are now in a position to state and discuss our main result concerning the avoidance of saddle  
 227 points under (RRM). For concreteness, we begin by discussing the technical assumptions that we  
 228 will need in Section 4.1; subsequently, we proceed with the formal statement of our result and some  
 229 direct applications thereof in Section 4.2.

230 **4.1. Technical assumptions.** Our technical assumptions concern the three main ingredients of  
 231 (RRM), namely (i) the method’s step-size sequence  $\gamma_n$ ; (ii) the statistics of the surrogate gradients  $\hat{v}_n$   
 232 entering (RRM); and (iii) the ambient manifold  $\mathcal{M}$ . Specifically, we will require the following:

233 **Assumption 1** (Step-size schedule). The step-size sequence  $\gamma_n$  of (RRM) satisfies

$$\sum_{n=1}^{\infty} \gamma_n = \infty \quad \text{and} \quad \sum_{n=1}^{\infty} \lambda^{1/\gamma_n} < \infty \quad \text{for all } \lambda \in (0, 1). \quad (12)$$

234 **Assumption 2** (Surrogate gradients). The offset and random error components of  $\hat{v}_n$  satisfy

$$\|b_n\|_{x_n} \leq C\gamma_n, \quad \|U_n\|_{x_n} \leq \sigma, \quad \mathbb{E}[\langle U_n, z \rangle_{x_n}]_+ | \mathcal{F}_n] \geq \zeta \quad (13)$$

235 for suitable constants  $C, \sigma, \zeta > 0$  and for all  $z \in \mathcal{T}_{X_n} \mathcal{M}$ ,  $\|z\|_{X_n} = 1$  (in the above, all conditions are  
 236 to be interpreted in the almost sure sense and  $[t]_+ = \max\{0, t\}$  denotes the positive part of  $t$ ).

237 **Assumption 3** (Injectivity radius). The injectivity radius of  $\mathcal{M}$  is bounded from below by  $\varrho > 0$ .

238 Before proceeding, we discuss the implications and range of validity of each of the above assumptions:

239 **On Assumption 1.** The step-size conditions typically encountered in the analysis of Rob-  
 240 bins–Monro schemes is the  $L^2 - L^1$  (“square-summable-but-not-summable”) condition  $\sum_n \gamma_n = \infty$ ,  
 241  $\sum_n \gamma_n^2 < \infty$ , cf. [8, 11, 12, 15, 37, 56] and references therein. This puts a hard threshold on the  
 242 range of allowed step-size schedules at  $\Omega(1/n^{1/2})$ : any step-size that decays at least as slow as  $1/n^{1/2}$   
 243 cannot be used under the  $L^2 - L^1$  assumption. By contrast, the step-size condition (12) is considerably  
 244 more lax and can tolerate near-constant step-sizes of the form  $\gamma_n \propto 1/(\log n)^{1+\varepsilon}$  for some  $\varepsilon > 0$ .  
 245 This is enough to cover all decreasing step-size policies used in practice. [We also recall here that,  
 246 in stochastic non-convex settings, trajectory convergence cannot be guaranteed in general without a  
 247 vanishing step-size, cf. [8, 16, 38] and references therein.]

248 **On Assumption 2.** Three remarks are in order for the noise and offset requirements (13). First, we  
 249 should note that the condition  $b_n = \mathcal{O}(\gamma_n)$  is, a priori, *implicit*, because it depends on the statistics  
 250 of the feedback sequence  $\hat{v}_n$ , and these may be difficult to estimate in general. However, in most  
 251 practical applications, this quantity is under the *explicit* control of the optimizer: in particular, as we  
 252 show later in this section, this requirement is satisfied by all the specific algorithms of Section 3.2.

253 Likewise, the bounded noise requirement is satisfied in many practical cases of interest. For example,  
 254 when the problem’s objective function admits a finite-sum decomposition of the form  $f(x) =$   
 255  $\sum_{i=1}^N f_i(x)$  for an ensemble of empirical instances  $f_i$ ,  $i = 1, \dots, N$  (the standard framework for

256 applications to data science and machine learning),  $U_n$  is typically generated by sampling a minibatch  
 257 of  $f$ , which in turn results in an error term of the form  $U_n = q(X_n)$  where  $q(x) : \mathcal{M} \rightarrow \mathcal{T}_x \mathcal{M}$  is  
 258 bounded on all compact subsets of  $\mathcal{M}$ . Therefore,  $\|U_n\|_{x_n} \leq \|q(X_n)\|_{x_n} < \sigma$  for some constant  $\sigma$   
 259 for any convergent algorithm  $\{X_n\}_n$ .

260 Finally, the “uniform excitability” condition  $\mathbb{E}[\langle U_n, z \rangle_{x_n}]_+ | \mathcal{F}_n] \geq \zeta$  is also standard in the avoid-  
 261 ance literature [8, 51], and it is substantially weaker than the *isotropic* condition, which, roughly  
 262 speaking, requires the noise to have the same  $L^2$  magnitude along all directions in space [24, 28, 51].  
 263 Instead, (12) only posits that the noise  $U_n$  has a *non-zero* component along each direction, and  
 264 imposes no other restrictions on the statistical profile of the noise.

265 **On Assumption 3.** For our last assumption, recall first that the injectivity radius of  $\mathcal{M}$  at a point  
 266  $x \in \mathcal{M}$  is the largest radius for which  $\exp_x$  is a diffeomorphism onto its image; the injectivity radius  
 267 of  $\mathcal{M}$  is then taken to be the infimum over all such radii [41]. In this regard, Assumption 3 simply  
 268 serves to ensure that the exponential map is invertible at consecutive iterates of (RRM) so no local  
 269 topological complications can arise. This assumption is automatically satisfied in closed manifolds  
 270 (independent of curvature), as well as in non-positively curved manifolds – such as Cartan-Hadamard  
 271 spaces and the like [41, 42]. This assumption (and its variants) is also standard in the literature, cf.  
 272 [15, 32, 63] and references therein.

273 **4.2. Avoidance of saddle points.** We are now in a position to state our main avoidance result:

274 **Theorem 1.** *Let  $X_n, n = 1, 2, \dots$ , be the sequence of states generated by (RRM), and let  $\mathcal{S}$  be a*  
 275 *strict saddle manifold of  $f$ . Then, under Assumptions 1–3, we have*

$$\mathbb{P}(\text{dist}(\mathcal{S}, X_n) \rightarrow 0 \text{ as } n \rightarrow \infty) = 0 \quad (14)$$

276 where  $\text{dist}(\mathcal{S}, X_n) = \inf_{x \in \mathcal{S}} \text{dist}(x, X_n)$  denotes the (Riemannian) distance of  $X_n$  from  $\mathcal{S}$ .

277 Before discussing the proof of Theorem 1, it is worthwhile to compare our work with its closest  
 278 antecedents. First, in regard to the general avoidance theory of [8, 10] in Euclidean spaces, the  
 279 statement is similar in scope (avoidance of unstable manifolds with probability 1), but the techniques  
 280 and challenges involved are very different. The reason for this is simple: the additive, vector space  
 281 structure of  $\mathbb{R}^m$  is ingrained at every step of the way in the Euclidean analysis of [8], and adapting  
 282 the various constructions to a manifold setting is a very intricate affair. For a compelling illustration  
 283 of the technical difficulties involved, see the recent stochastic approximation analysis of [31].

284 By contrast, the recent results of [20, 63] paint a complementary picture: they concern Riemannian  
 285 problems but, at their core, they are deterministic results. More precisely, the noise in [20, 63] is  
 286 actually *injected* in an otherwise deterministic gradient scheme to facilitate the escape from flat  
 287 regions in the vicinity of a saddle point; however, other than that, the magnitude of the noise must be  
 288 proportional to the solver’s desired accuracy, and hence is typically extremely small. As a result, the  
 289 analysis of [20, 63] cannot be extended to bona fide stochastic schemes – like (RSGD) – which also  
 290 explains why these results involve a constant step-size (as opposed to a decreasing step-size schedule,  
 291 which is required to guarantee trajectory convergence in settings with persistent noise). In this regard,  
 292 Theorem 1 simultaneously complements the stochastic analysis of [8, 10] to Riemannian problems,  
 293 and the Riemannian analysis of [20, 63] to a stochastic setting.

294 **Proof outline.** Because the proof of Theorem 1 is highly involved, we provide below a detailed  
 295 outline of the main steps and techniques involved therein, deferring the full proof to Appendix B. We  
 296 begin with a high-level description of our proof strategy and then encode the main arguments in a  
 297 series of steps right after.

298 For the purposes of illustration, suppose that  $\mathcal{M}$  is a subset of  $\mathbb{R}^m$ . Then, given a tangent vector  
 299  $z \in \mathcal{T}_x \mathcal{M}$ , we define the *geodesic offset* (see Fig. 1) from  $x$  along  $z$  as

$$\Delta(x; z) = \exp_x(z) - x - z \quad (15)$$

300 i.e., as the difference between the geodesic emanating from  $x$  along  $z$  and its first-order approximation  
 301 relative to  $x$  in the ambient space  $\mathbb{R}^m$  (with all differences expressed in the ordinary vector space  
 302 structure of  $\mathbb{R}^m$ ). The offset  $\Delta(x; z)$  is readily checked to be second-order in  $z$  so, while the curve  
 303  $x + tz$  does not in general induce a retraction on the target manifold  $\mathcal{M}$  (in particular, the point  $x + tz$

304 may not even *belong* to  $\mathcal{M}$ ), the converse *is* true: the map  $\exp_x(z)$  is always a retraction on the  
 305 ambient, Euclidean space  $\mathbb{R}^m$ . In this way, the basic iteration (RRM) can be expressed as

$$X_{n+1} = \exp_{X_n}(\gamma_n \hat{v}_n) = X_n + \gamma_n \hat{v}_n + \Delta(X_n; \gamma_n \hat{v}_n) \quad (16)$$

306 leading to the fundamental question below:

307 *What is the maximum offset  $\epsilon_n := \Delta(X_n; \gamma_n \hat{v}_n)$  that can be tolerated by a*  
 308 *Euclidean stochastic approximation algorithm to avoid saddle points?*

309 A key technical step in our work is to develop the means to control the offset term  $\epsilon_n$  under (RRM)  
 310 under a sufficiently broad class of assumptions that includes Algorithms 1–5. This turns out to be  
 311 a highly intricate affair, which is only made possible thanks to the very recent – and technical –  
 312 stochastic approximation work of [31]. To help the reader navigate our proof strategy, we outline the  
 313 main steps below, focusing for simplicity on the case of a single saddle point.

314 **Step 1: From discrete to continuous time (and back).** Let  $\hat{x}$  be a strict saddle point of  $f$ . By the  
 315 stable manifold theorem [60], the set of all initializations such that the Riemannian gradient flow

$$\dot{x}(t) = -\text{grad}f(x(t)) \quad (\text{RGF})$$

316 converges to  $\hat{x}$  is of measure 0. Then, assuming for the moment that the geodesic offset error  $\epsilon_n =$   
 317  $\Delta(X_n; \gamma_n \hat{v}_n)$  in (16) is sufficiently small, the iterates of (RRM) can be seen as a noisy, approximate  
 318 Euler discretization of (RGF); as such, it is reasonable to expect that the induced trajectories of  
 319 (RRM) will never converge to  $\hat{x}$ .

320 To make this intuition precise, our first step will be to show that the iterates of (RRM) comprise an  
 321 *asymptotic pseudotrajectory* of (RGF) in the sense of Benaïm [8], i.e., they asymptotically track the  
 322 orbits of (RGF) with arbitrary precision over windows of arbitrary length. To formalize this, define  
 323 the “effective time” variable  $\tau_n = \sum_{k=1}^{n-1} \gamma_k$  and the associated *geodesic interpolation*  $X(t)$  of  $X_n$  as

$$X(t) = \exp_{X_n}((t - \tau_n)\hat{v}_n) \quad \text{for all } t \in [\tau_n, \tau_{n+1}), n \geq 1 \quad (\text{GI})$$

324 so, by construction, (a)  $X(\tau_n) = X_n$  for all  $n$ ; and (b) each segment of  $X(t)$  is a geodesic. Then,  
 325 letting  $\Phi: \mathbb{R}_+ \times \mathcal{M} \rightarrow \mathcal{M}$  denote the *flow* of (RGF) – i.e.,  $\Phi_h(x)$  is simply the position at time  $h \geq 0$   
 326 of the solution orbit of (RGF) that starts at  $x \in \mathcal{M}$  – we will say that  $X(t)$  is an APT of (RGF) if, for  
 327 all  $T > 0$ , we have

$$\lim_{t \rightarrow \infty} \sup_{0 \leq h \leq T} \text{dist}(X(t+h), \Phi_h(X(t))) = 0. \quad (\text{APT})$$

328 This is a highly non-trivial requirement, and our first technical result is to guarantee precisely this:

329 **Theorem 2.** *Suppose that Assumptions 1–3 hold. Then, with probability 1, the geodesic interpolation*  
 330  *$X(t)$  of the sequence of iterates  $X_n, n = 1, 2, \dots$ , generated by (RRM) is an APT of (RGF).*

331 A version of Theorem 2 was very recently derived by [31] under a different set of assumptions: On  
 332 the one hand, [31] imposes a much more restrictive step-size schedule for  $\gamma_n$  (square summability)  
 333 but, on the other hand, it only posits that the noise increments  $U_n$  are bounded in  $L^2$  (as opposed to  
 334  $L^\infty$  in our case). Our proof relies on the same construction of the Picard iteration map as [31], but  
 335 otherwise diverges significantly in the probabilistic analysis required to establish (APT).

336 **Step 2: From Riemannian to Euclidean schemes (and back).** Albeit crucial, the APT property is  
 337 decidedly not enough to guarantee avoidance: after all, the constant orbit  $X(t) = \hat{x}$  for all  $t \geq 0$  is  
 338 trivially an APT of (RGF) but, of course, it does not avoid  $\hat{x}$ . To proceed, we will need to exploit the  
 339 precise update structure of (RRM) in conjunction with the stable manifold theorem applied to (RGF).

340 In the Euclidean case, this is achieved by means of a very intricate Lyapunov function argument,  
 341 originally due to [9]. Extending this construction to a Riemannian setting is a highly non-trivial  
 342 task so, instead, we devise a new geometric argument to reduce the analysis from an arbitrary  
 343 *intrinsic* manifold to an isometrically embedded submanifold of  $\mathbb{R}^m$ . This step is carried out by a  
 344 combination of the celebrated Nash embedding theorem and a (smooth) Tietze extension argument to  
 345 rewrite (RRM) as a “corrected” Robbins–Monro scheme on  $\mathbb{R}^m$  that actually evolves on  $\mathcal{M}$ . This  
 346 construction also requires a “perturbation analysis” to ensure that certain subtle topological issues do  
 347 not arise when we invoke the stable manifold theorem; we present the details in Appendix B.



348 **Step 3: Controlling the geodesic offset.** As we briefly  
 349 described in the beginning of the proof overview, this Eu-  
 350 clidean reframing of (RRM) introduces an intrinsic offset  
 351 error  $\epsilon_n = \Delta(X_n; \gamma_n \hat{v}_n)$ , which is difficult to analyze in detail  
 352 (the offset incurred by a retraction on  $\mathcal{M}$  is of similar order,  
 353 so the exponential-retraction distinction is not important at  
 354 this stage). Our crucial observation here is that, under our  
 355 blanket assumptions,  $\epsilon_n$  is small relative to  $\gamma_n$  and, in par-  
 356 ticular,  $\epsilon_n = \mathcal{O}(\gamma_n^2)$ . Thanks to this bound, we are able to  
 357 leverage a series of stochastic bounds – originally developed  
 358 by Pemantle [51] – to show that the probability that these  
 359 terms will have an adverse effect on exiting the center man-  
 360 ifold of  $\hat{x}$  is zero (this is also where Assumption 2 comes in).

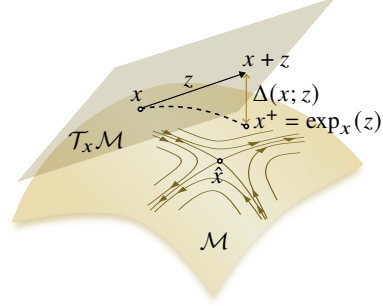

Figure 1: The geodesic offset  $\Delta(x; z)$ .

361 We formalize this step in Appendix B; Theorem 1 then follows by putting everything together.

362 *Remark.* A concept similar to our geodesic offset  $\Delta(x; z)$  has been explored in the *reverse direction*  
 363 by the very recent works [13, 21], whose goal was to study of avoidance of *Euclidean* subgradient  
 364 methods as an inexact Riemannian gradient scheme. They further show that this inexact Riemannian  
 365 gradient descent can avoid saddle points if uniform noise is injected. While their core idea bears  
 366 some similarity to ours, it remains unclear how to apply the analysis in [13, 21] to handle general  
 367 RRM schemes, such as retraction-based methods and natural policy gradient.

368 **4.3. Applications.** As an illustration of the generality of Theorem 1, we now instantiate it to  
 369 the range of specific algorithms discussed in Section 3.2. Since all these algorithms are run with  
 370 gradient input generated by (SFO), applying Theorem 1 would require mapping the requirements  
 371 of Assumption 2 to the primitives of (SFO). A convenient way to achieve this is by means of the  
 372 proposition below:

373 **Proposition 1.** Suppose that Algorithms 1–5 are run with a gradient oracle  $V(x; \theta) = v(x) + \text{err}(x; \theta)$   
 374 such that

$$\|\text{err}(x; \theta)\|_x \leq \sigma(x) \quad \text{and} \quad \mathbb{E}[\langle \text{err}(x; \theta), z \rangle_x] \geq \zeta(x) \quad (17)$$

375 for all  $z \in T_x \mathcal{M}$ ,  $\|z\|_x = 1$ , and for suitable functions  $\zeta, \sigma: \mathcal{M} \rightarrow \mathbb{R}_+$  with  $\sigma$  bounded on bounded  
 376 subsets of  $\mathcal{M}$  and  $\inf_x \zeta(x) > 0$ . Then, under Assumptions 1 and 3, the conclusion of Theorem 1  
 377 holds, that is, Algorithms 1–5 avoid strict saddle manifolds of  $f$ .

378 The proof of Proposition 1 is deferred to Appendix B; we only note here that its proof mainly hinges  
 379 on verifying the bias requirement  $\|b_n\|_{X_n} = \mathcal{O}(\gamma_n)$  of (13) by means of (i) the boundedness of the  
 380 error function  $\sigma(x)$  on bounded subsets of  $\mathcal{M}$ ; and (ii) controlling the maximal deviation between a  
 381 retraction and the exponential map for input vectors bounded by  $\varrho$ .

## 382 5 Conclusions and future work

383 In this paper, we addressed the question of when Riemannian stochastic algorithms can effectively  
 384 evade saddle points, focusing on the broad category of Riemannian Robbins–Monro schemes. We  
 385 introduced a novel framework for analyzing the avoidance of Riemannian saddle points within the  
 386 RRM framework, which encompasses many commonly used Riemannian stochastic algorithms,  
 387 including retraction-based algorithms. Our framework builds upon the notion of strict saddle points  
 388 and provides a set of easily verifiable conditions that guarantee the avoidance of such traps.

389 Our work paves the way for several promising research directions in learning with Riemannian  
 390 methods. One intriguing avenue for exploration is the investigation of whether Riemannian *zeroth-*  
 391 *order* methods, such as the Riemannian extension of the work by Kiefer and Wolfowitz [34], can  
 392 effectively evade strict saddle points. We believe that combining the insights from the asymptotic  
 393 pseudotrajectory theory with Euclidean analysis can shed light on this question and provide valuable  
 394 insights into the behavior of these methods in the Riemannian setting.

395 Furthermore, an interesting direction for future research is the extension of the avoidance of *unstable*  
 396 *limit cycles* in Euclidean min-max optimization, as studied by Hsieh et al. [27], to the realm of Rie-  
 397 *mannian* games. Investigating the avoidance of unstable limit cycles in this context has the potential  
 398 to uncover novel phenomena specific to the manifold settings, leading to a deeper understanding on  
 399 the intricate dynamics and strategies involved in Riemannian games.

400 **References**

- 401 [1] Ralph Abraham and Jerrold E Marsden. *Foundations of mechanics*. Number 364. American Mathematical  
402 Soc., 2008.
- 403 [2] Pierre-Antoine Absil, Robert Mahony, and Rodolphe Sepulchre. *Optimization Algorithms on Matrix*  
404 *Manifolds*. Princeton University Press, 2008.
- 405 [3] Felipe Alvarez, Jérôme Bolte, and Olivier Brahic. Hessian Riemannian gradient flows in convex program-  
406 ming. *SIAM Journal on Control and Optimization*, 43(2):477–501, 2004.
- 407 [4] Shun-Ichi Amari. Natural gradient works efficiently in learning. *Neural computation*, 10(2):251–276,  
408 1998.
- 409 [5] Waïss Azizian, Franck Iutzeler, Jérôme Malick, and Panayotis Mertikopoulos. On the rate of convergence  
410 of Bregman proximal methods in constrained variational inequalities. [http://arxiv.org/abs/2211.](http://arxiv.org/abs/2211.08043)  
411 [08043](http://arxiv.org/abs/2211.08043), 2022.
- 412 [6] Heinz H. Bauschke, Jérôme Bolte, and Marc Teboulle. A descent lemma beyond Lipschitz gradient  
413 continuity: First-order methods revisited and applications. *Mathematics of Operations Research*, 42(2):  
414 330–348, May 2017.
- 415 [7] Amir Beck and Marc Teboulle. Mirror descent and nonlinear projected subgradient methods for convex  
416 optimization. *Operations Research Letters*, 31(3):167–175, 2003.
- 417 [8] Michel Benaïm. Dynamics of stochastic approximation algorithms. In Jacques Azéma, Michel Émery,  
418 Michel Ledoux, and Marc Yor, editors, *Séminaire de Probabilités XXXIII*, volume 1709 of *Lecture Notes*  
419 *in Mathematics*, pages 1–68. Springer Berlin Heidelberg, 1999.
- 420 [9] Michel Benaïm and Morris W. Hirsch. Dynamics of Morse-Smale urn processes. *Ergodic Theory and*  
421 *Dynamical Systems*, 15(6):1005–1030, December 1995.
- 422 [10] Michel Benaïm and Morris W. Hirsch. Asymptotic pseudotrajectories and chain recurrent flows, with  
423 applications. *Journal of Dynamics and Differential Equations*, 8(1):141–176, 1996.
- 424 [11] Albert Benveniste, Michel Métivier, and Pierre Priouret. *Adaptive Algorithms and Stochastic Approxima-*  
425 *tions*. Springer, 1990.
- 426 [12] Dimitri P. Bertsekas and John N. Tsitsiklis. Gradient convergence in gradient methods with errors. *SIAM*  
427 *Journal on Optimization*, 10(3):627–642, 2000.
- 428 [13] Pascal Bianchi, Walid Hachem, and Sholom Schechtman. Stochastic subgradient descent escapes active  
429 strict saddles on weakly convex functions. *arXiv preprint arXiv:2108.02072*, 2021.
- 430 [14] Immanuel M. Bomze, Panayotis Mertikopoulos, Werner Schachinger, and Mathias Staudigl. Hessian  
431 barrier algorithms for linearly constrained optimization problems. *SIAM Journal on Optimization*, 29(3):  
432 2100–2127, 2019.
- 433 [15] Silvére Bonnabel. Stochastic gradient descent on Riemannian manifolds. *IEEE Trans. Autom. Control*, 58  
434 (9):2217–2229, September 2013.
- 435 [16] Vivek S. Borkar. *Stochastic Approximation: A Dynamical Systems Viewpoint*. Cambridge University Press  
436 and Hindustan Book Agency, 2008.
- 437 [17] Nicolas Boumal. *An introduction to optimization on smooth manifolds*. [https://www.nicolasboumal.](https://www.nicolasboumal.net/book/)  
438 [net/book/](https://www.nicolasboumal.net/book/), 2022.
- 439 [18] Odile Brandière and Marie Duflou. Les algorithmes stochastiques contournent-ils les pièges ? *Annales de*  
440 *l’Institut Henri Poincaré, Probabilités et Statistiques*, 32(3):395–427, 1996.
- 441 [19] Anna Choromanska, Mikael Henaff, Michael Mathieu, Gérard Ben Arous, and Yann LeCun. The loss  
442 surfaces of multilayer networks. In *AISTATS ’15: Proceedings of the 18th International Conference on*  
443 *Artificial Intelligence and Statistics*, 2015.
- 444 [20] Christopher Criscitiello and Nicolas Boumal. Efficiently escaping saddle points on manifolds. *Advances in*  
445 *Neural Information Processing Systems*, 32, 2019.
- 446 [21] Damek Davis, Dmitriy Drusvyatskiy, and Liwei Jiang. Subgradient methods near active manifolds: saddle  
447 point avoidance, local convergence, and asymptotic normality. *arXiv preprint arXiv:2108.11832*, 2021.
- 448 [22] Johannes Jisse Duistermaat. On Hessian Riemannian structures. *Asian Journal of Mathematics*, 5:79–91,  
449 2001.
- 450 [23] OP Ferreira and PR Oliveira. Proximal point algorithm on Riemannian manifolds. *Optimization*, 51(2):  
451 257–270, 2002.
- 452 [24] Rong Ge, Furong Huang, Chi Jin, and Yang Yuan. Escaping from saddle points – Online stochastic gradient  
453 for tensor decomposition. In *COLT ’15: Proceedings of the 28th Annual Conference on Learning Theory*,  
454 2015.
- 455 [25] Morris W. Hirsch. *Differential Topology*. Springer-Verlag, Berlin, 1976.

- 456 [26] Thomas Y Hou, Zhenzhen Li, and Ziyun Zhang. Analysis of asymptotic escape of strict saddle sets in  
457 manifold optimization. *SIAM Journal on Mathematics of Data Science*, 2(3):840–871, 2020.
- 458 [27] Ya-Ping Hsieh, Panayotis Mertikopoulos, and Volkan Cevher. The limits of min-max optimization  
459 algorithms: Convergence to spurious non-critical sets. In *International Conference on Machine Learning*,  
460 pages 4337–4348. PMLR, 2021.
- 461 [28] Chi Jin, Rong Ge, Praneeth Netrapalli, Sham M Kakade, and Michael I Jordan. How to escape saddle  
462 points efficiently. In *International conference on machine learning*, pages 1724–1732. PMLR, 2017.
- 463 [29] Anatoli Juditsky, Arkadi Semen Nemirovski, and Claire Tauvel. Solving variational inequalities with  
464 stochastic mirror-prox algorithm. *Stochastic Systems*, 1(1):17–58, 2011.
- 465 [30] Sham M Kakade. A natural policy gradient. *Advances in neural information processing systems*, 14, 2001.
- 466 [31] Mohammad Reza Karimi, Ya-Ping Hsieh, Panayotis Mertikopoulos, and Andreas Krause. The dynamics  
467 of Riemannian Robbins-Monro algorithms. In *COLT '22: Proceedings of the 35th Annual Conference on*  
468 *Learning Theory*, 2022.
- 469 [32] Mohammad Reza Karimi, Ya-Ping Hsieh, Panayotis Mertikopoulos, and Andreas Krause. The dynamics  
470 of Riemannian Robbins-Monro algorithms. In *COLT 2022-35th Annual Conference on Learning Theory*,  
471 pages 1–31, 2022.
- 472 [33] Kenji Kawaguchi. Deep learning without poor local minima. In *NIPS '16: Proceedings of the 30th*  
473 *International Conference on Neural Information Processing Systems*, 2016.
- 474 [34] Jack Kiefer and Jacob Wolfowitz. Stochastic estimation of the maximum of a regression function. *The*  
475 *Annals of Mathematical Statistics*, 23(3):462–466, 1952.
- 476 [35] Shoshichi Kobayashi and Katsumi Nomizu. *Foundations of Differential Geometry*. Wiley Classics Library.  
477 Wiley, 2 edition, 1996.
- 478 [36] G. M. Korpelevich. The extragradient method for finding saddle points and other problems. *Èkonom. i*  
479 *Mat. Metody*, 12:747–756, 1976.
- 480 [37] Harold J. Kushner and D. S. Clark. *Stochastic Approximation Methods for Constrained and Unconstrained*  
481 *Systems*. Springer, 1978.
- 482 [38] Harold J. Kushner and G. G. Yin. *Stochastic approximation algorithms and applications*. Springer-Verlag,  
483 New York, NY, 1997.
- 484 [39] Jason D Lee, Max Simchowitz, Michael I Jordan, and Benjamin Recht. Gradient descent only converges to  
485 minimizers. In *29th Annual Conference on Learning Theory*, pages 1246–1257, 2016.
- 486 [40] Jason D Lee, Ioannis Panageas, Georgios Piliouras, Max Simchowitz, Michael I Jordan, and Benjamin  
487 Recht. First-order methods almost always avoid strict saddle points. *Mathematical programming*, 176:  
488 311–337, 2019.
- 489 [41] John M. Lee. *Riemannian Manifolds: an Introduction to Curvature*. Number 176 in Graduate Texts in  
490 Mathematics. Springer, 1997.
- 491 [42] John M. Lee. *Introduction to Smooth Manifolds*. Number 218 in Graduate Texts in Mathematics. Springer-  
492 Verlag, New York, NY, 2003.
- 493 [43] Panayotis Mertikopoulos, Nadav Hallak, Ali Kavis, and Volkan Cevher. On the almost sure convergence of  
494 stochastic gradient descent in non-convex problems. In *NeurIPS '20: Proceedings of the 34th International*  
495 *Conference on Neural Information Processing Systems*, 2020.
- 496 [44] Panayotis Mertikopoulos, Nadav Hallak, Ali Kavis, and Volkan Cevher. On the almost sure convergence of  
497 stochastic gradient descent in non-convex problems. *Advances in Neural Information Processing Systems*,  
498 33, 2020.
- 499 [45] Gilles Meyer, Silvere Bonnabel, and Rodolphe Sepulchre. Linear regression under fixed-rank constraints:  
500 a riemannian approach. In *28th International Conference on Machine Learning*, 2011.
- 501 [46] Arkadi Semen Nemirovski and David Berkovich Yudin. *Problem Complexity and Method Efficiency in*  
502 *Optimization*. Wiley, New York, NY, 1983.
- 503 [47] Yurii Nesterov. *Introductory Lectures on Convex Optimization: A Basic Course*. Number 87 in Applied  
504 Optimization. Kluwer Academic Publishers, 2004.
- 505 [48] JX Cruz Neto, PSM Santos, and PA Soares. An extragradient method for equilibrium problems on  
506 Hadamard manifolds. *Optimization Letters*, 10(6):1327–1336, 2016.
- 507 [49] Erkki Oja. Principal components, minor components, and linear neural networks. *Neural networks*, 5(6):  
508 927–935, 1992.
- 509 [50] Ioannis Panageas, Georgios Piliouras, and Xiao Wang. First-order methods almost always avoid saddle  
510 points: The case of vanishing step-sizes. In *Advances in Neural Information Processing Systems*, pages  
511 6471–6480, 2019.
- 512 [51] Robin Pemantle. Nonconvergence to unstable points in urn models and stochastic approximations. *Annals*  
513 *of Probability*, 18(2):698–712, April 1990.

- 514 [52] Robin Pemantle. Vertex-reinforced random walk. *Probability Theory and Related Fields*, 92:117–136,  
515 1992.
- 516 [53] Leonid Denisovich Popov. A modification of the Arrow–Hurwicz method for search of saddle points.  
517 *Mathematical Notes of the Academy of Sciences of the USSR*, 28(5):845–848, 1980.
- 518 [54] Alexander Rakhlin and Karthik Sridharan. Online learning with predictable sequences. In *COLT '13:  
519 Proceedings of the 26th Annual Conference on Learning Theory*, 2013.
- 520 [55] Garvesh Raskutti and Sayan Mukherjee. The information geometry of mirror descent. *IEEE Transactions  
521 on Information Theory*, 61(3):1451–1457, 2015.
- 522 [56] Herbert Robbins and Sutton Monro. A stochastic approximation method. *Annals of Mathematical Statistics*,  
523 22:400–407, 1951.
- 524 [57] Ralph Tyrrell Rockafellar. *Convex Analysis*. Princeton University Press, Princeton, NJ, 1970.
- 525 [58] Ralph Tyrrell Rockafellar and Roger J. B. Wets. *Variational Analysis*, volume 317 of *A Series of Compre-  
526 hensive Studies in Mathematics*. Springer-Verlag, Berlin, 1998.
- 527 [59] Alexander Shapiro, Darinka Dentcheva, and Andrzej Ruszczyński. *Lectures on Stochastic Programming*.  
528 Society for Industrial and Applied Mathematics, Philadelphia, PA, 2009.
- 529 [60] Michael Shub. *Global Stability of Dynamical Systems*. Springer-Verlag, Berlin, 1987.
- 530 [61] Suvrit Sra and Reshad Hosseini. Conic geometric optimization on the manifold of positive definite matrices.  
531 *SIAM Journal on Optimization*, 25(1):713–739, 2015.
- 532 [62] Ju Sun, Qing Qu, and John Wright. Complete dictionary recovery over the sphere ii: Recovery by  
533 riemannian trust-region method. *IEEE Transactions on Information Theory*, 63(2):885–914, 2016.
- 534 [63] Yue Sun, Nicolas Flammarion, and Maryam Fazel. Escaping from saddle points on riemannian manifolds.  
535 *Advances in Neural Information Processing Systems*, 32, 2019.
- 536 [64] Guo-ji Tang and Nan-jing Huang. Korpelevich’s method for variational inequality problems on Hadamard  
537 manifolds. *Journal of Global Optimization*, 54(3):493–509, 2012.

## 538 A Further examples of RRM schemes

539 In this section, we provide two additional algorithmic examples supplementing the range of [Algo-](#)  
540 [rithms 1–5](#) to illustrate the applicability of our RRM template.

541 **Algorithm 6** (Riemannian proximal point methods). The (deterministic) *Riemannian proximal point*  
542 *method* (RPPM) [23] is an implicit (“backward”) update rule of the form

$$\log_{X_{n+1}}(X_n) = -\gamma_n v(X_{n+1}). \quad (\text{RPPM})$$

543 The RRM representation of (RPPM) is then obtained by taking  $b_n = \Gamma_{X_{n+1} \rightarrow X_n}(v(X_{n+1})) - v(X_n)$  and  
544  $U_n = 0$  in the decomposition (5) of the error term  $W_n$  of (RRM). If, in addition, the true gradient  
545  $v(X_{n+1})$  is replaced by an oracle  $V(X_{n+1}; \theta_{n+1})$ , then (RPPM) becomes the stochastic version of  
546 RPPM by setting

$$b_n = \mathbb{E}[\Gamma_{X_{n+1} \rightarrow X_n}(V(X_{n+1}; \theta_{n+1})) - v(X_n) \mid \mathcal{F}_n]$$

547 and

$$U_n = \Gamma_{X_{n+1} \rightarrow X_n}(V(X_{n+1}; \theta_{n+1})) - v(X_n) - b_n.$$

548 For a detailed discussion, see [23] and references therein.  $\blacklozenge$

549 **Algorithm 7** (Riemannian stochastic extra-gradient). Inspired by the original work of Korpelevich  
550 [36], the *Riemannian stochastic extra-gradient* (RSEG) method [48, 64] proceeds as

$$\begin{aligned} X_n^+ &= \exp_{X_n}(\gamma_n V(X_n; \theta_n)), \\ X_{n+1} &= \exp_{X_n}(\Gamma_{X_n^+ \rightarrow X_n}(\gamma_n V(X_n^+; \theta_n^+))) \end{aligned} \quad (\text{RSEG})$$

551 where  $\theta_n$  and  $\theta_n^+$  are independent seeds for (SFO). Thus, to cast (RSEG) in the RRM framework, it  
552 suffices to take  $U_n = \Gamma_{X_n^+ \rightarrow X_n}(\text{err}(X_n^+; \theta_n^+))$  and  $b_n = \Gamma_{X_n^+ \rightarrow X_n}(v(X_n^+)) - v(X_n)$ .  $\blacklozenge$

553 Under the assumptions in [Proposition 1](#), one can show that [Algorithms 6–7](#) also avoid strict saddle  
554 points of  $f$ ; we provide the relevant details in [Appendix B.3](#).

## 555 B Missing Proofs of Section 4

556 **B.1. Proof of Theorem 2.** We begin by proving [Theorem 2](#), which will play a crucial role in our  
557 proof of [Theorem 1](#). For the reader’s convenience, we restate the result below:

558 **Theorem 2.** *Suppose that [Assumptions 1–3](#) hold. Then, with probability 1, the geodesic interpolation*  
559  *$X(t)$  of the sequence of iterates  $X_n, n = 1, 2, \dots$ , generated by (RRM) is an APT of (RGF).*

560 *Proof.* To begin, let  $\{e_i(n)\}_{i=1}^d$  be an arbitrary sequence of orthonormal bases for  $\mathcal{T}_{X_n} \mathcal{M}$ , and let  $U_n^{\parallel}$   
561 be the (Euclidean) noise vector composed of components of the noise  $U_n$  in the basis  $\{e_i(n)\}_{i=1, \dots, d}$ ,  
562 viz.

$$U_{i,n}^{\parallel} := \langle U_n, e_i(n) \rangle_{X_n}. \quad (\text{B.1})$$

563 It is then easy to see that  $\mathbb{E}[U_n^{\parallel} \mid \mathcal{F}_n] = 0$ , and, moreover

$$\|U_n^{\parallel}\| = \|U_n\|_{X_n} \leq \sigma \quad (\text{B.2})$$

564 by [Assumption 2](#). Then, following Benaïm [8], consider the “continuous-to-discrete” counter

$$M(t) = \sup\{n \geq 1 : t \geq \tau_n\} \quad (\text{B.3})$$

565 which measures the number of iterations required for the effective time  $\tau_n = \sum_{k=1}^{n-1} \gamma_k$  to reach a given  
566 timestamp  $t \geq 0$ . We further denote the piecewise-constant interpolation of the noise sequence as

$$\bar{U}^{\parallel}(t) = U_n^{\parallel} \quad \text{for all } t \in [\tau_n, \tau_{n+1}), n \geq 1 \quad (\text{B.4})$$

567 and we let

$$\Delta(t; T) := \sup_{0 \leq h \leq T} \left\| \int_t^{t+h} \bar{U}^{\parallel}(s) ds \right\|. \quad (\text{B.5})$$

568 Moving forward, since  $X_n \rightarrow \mathcal{S}$  by assumption, we will also have

$$\sup_n \text{dist}(X_n, x) =: R < \infty \quad \text{for all } x \in \mathcal{S} \quad (\text{B.6})$$

569 for some (possibly random)  $R \geq 0$ . Moreover, since  $f$  is assumed to be  $C^2$ , (B.6) implies that

$$\sup_n \|v(X_n)\|_{X_n} =: G < \infty \quad (\text{B.7})$$

570 for some (possibly random) non-negative constant  $G \geq 0$ . Moreover, since the manifold  $\mathcal{M}$  is  
 571 assumed to be smooth, the sectional curvatures at each  $X_n$ ,  $n = 1, 2, \dots$ , must be likewise bounded  
 572 by some constant  $K_{\max}$ . Then, by the analysis of [32, Eq. 53], there exists a constant  $C \equiv C_{L,G,K_{\max},R}$   
 573 depending only on  $L, G, K_{\max}$  and  $R$  such that

$$\sup_{0 \leq h \leq T} \text{dist}(X(t+h), \Phi_h(X(t))) \leq C_{L,G,K_{\max},R} \cdot \left[ \sup_{n \geq M(t)} (\|b_n\|_{X_n} + \gamma_n) + \Delta(t-1; T+1) \right] \quad (\text{B.8})$$

574 By [Assumption 2](#), we have  $\|b_n\|_{X_n} = \mathcal{O}(\gamma_n)$ . Since  $\gamma_n \rightarrow 0$ , it suffices to show that  $\Delta(t; T) \rightarrow 0$   
 575 with probability 1 under [Assumptions 1](#) and [2](#). This is equivalent to showing that, for any  $\varepsilon > 0$ , we  
 576 have

$$\lim_{t \rightarrow \infty} \Delta(t; T) \leq \varepsilon \quad \text{with probability 1.} \quad (\text{B.9})$$

577 To this end, let  $n = M(t)$  and recall that, by (B.2), we have

$$\mathbb{E}[\exp(\langle w, \bar{U}_n^{\parallel} \rangle) | \mathcal{F}_n] \leq \exp\left(\frac{\sigma^2}{2} \|w\|^2\right) \quad (\text{B.10})$$

578 for all  $w \in \mathbb{R}^d$  where  $d$  is the dimension of  $\mathcal{M}$ . Therefore, for each  $w \in \mathbb{R}^d$ , the sequence  $Y_n(w)$   
 579 defined by

$$Y_n(w) := \exp\left(\sum_{k=1}^n \langle w, \gamma_k \bar{U}_k^{\parallel} \rangle - \frac{\sigma^2 \|w\|^2}{2} \sum_{k=1}^n \gamma_k^2\right) \quad (\text{B.11})$$

580 is a supermartingale. Since  $Y_n$  is a supermartingale, we have

$$\begin{aligned} & \mathbb{P}\left(\sup_{n < k \leq M(\tau_n+T)} \sum_{i=n}^{k-1} \langle w, \gamma_i \bar{U}_i^{\parallel} \rangle \geq \delta\right) \\ & \leq \mathbb{P}\left(\sup_{n < k \leq M(\tau_n+T)} Y_k(w) \geq Y_n(w) \exp\left(\delta - \frac{\sigma^2 \|w\|^2}{2} \sum_{i=n}^{M(\tau_n+T)-1} \gamma_i^2\right)\right) \\ & \leq \exp\left(\frac{\sigma^2 \|w\|^2}{2} \sum_{i=n}^{M(\tau_n+T)-1} \gamma_i^2 - \delta\right) \end{aligned} \quad (\text{B.12})$$

581 for any  $\delta > 0$ . Now, let  $e_i$  be the  $i$ -th basis vector of  $\mathbb{R}^d$ . Then, by (B.12), we have

$$\begin{aligned} \mathbb{P}\left(\sup_{n < k \leq M(\tau_n+T)} \sum_{i=n}^{k-1} \langle \pm de_i, \gamma_k \bar{U}_k^{\parallel} \rangle \geq \varepsilon\right) &= \mathbb{P}\left(\sup_{n < k \leq M(\tau_n+T)} \sum_{i=n}^{k-1} \langle \pm \varepsilon^{-1} \delta de_i, \gamma_k \bar{U}_k^{\parallel} \rangle \geq \delta\right) \\ &\leq \exp\left(\frac{\sigma^2 \delta^2 d^2}{2\varepsilon^2} \sum_{i=n}^{M(\tau_n+T)-1} \gamma_i^2 - \delta\right). \end{aligned} \quad (\text{B.13})$$

582 Optimizing (B.13) over  $\delta$ , we get

$$\mathbb{P}\left(\sup_{n < k \leq M(\tau_n+T)} \sum_{i=n}^{k-1} \langle \pm de_i, \gamma_k \bar{U}_k^{\parallel} \rangle \geq \varepsilon\right) \leq \exp\left(-\frac{\varepsilon^2}{2\sigma^2 d^2 \sum_{i=n}^{M(\tau_n+T)-1} \gamma_i^2}\right). \quad (\text{B.14})$$

583 Since  $\gamma_n \rightarrow 0$ , with loss of generality we may assume that  $\gamma_n \leq 1$ , and hence

$$\begin{aligned} \mathbb{P}\left(\sup_{n < k \leq M(\tau_n+T)} \sum_{i=n}^{k-1} \langle \pm de_i, \gamma_k \bar{U}_k^{\parallel} \rangle \geq \varepsilon\right) &\leq \exp\left(-\frac{\varepsilon^2}{2\sigma^2 d^2 \sum_{i=n}^{M(\tau_n+T)-1} \gamma_i}\right) \\ &\leq \exp\left(-\frac{\varepsilon^2}{2\sigma^2 d^2 \int_t^{t+T} \bar{\gamma}(t)}\right) \end{aligned} \quad (\text{B.15})$$

584 where, analogously to (B.4), we have defined the piece-wise constant interpolated step-size sequence

$$\bar{\gamma}(t) = \gamma_n \quad \text{for all } t \in [\tau_n, \tau_{n+1}), n \geq 1. \quad (\text{B.16})$$

585 Since

$$\left\| \sum_{i=n}^{k-1} \gamma_i \bar{U}_i \right\| \geq \varepsilon \quad \Rightarrow \quad \exists i \text{ such that } \sum_{i=n}^{k-1} \langle \pm de_i, \gamma_i \bar{U}_i \rangle \geq \varepsilon, \quad (\text{B.17})$$

586 by the union bound, we have

$$\mathbb{P}(\Delta(t, T) \geq \varepsilon) \leq 2d \cdot \exp\left(-\frac{\varepsilon^2}{2\sigma^2 d^2 \int_t^{t+T} \bar{\gamma}(s) ds}\right) \leq 2d \cdot \exp\left(-\frac{\varepsilon^2}{2\sigma^2 d^2 T \bar{\gamma}(s)}\right) \quad (\text{B.18})$$

587 for some  $t \leq s \leq t+T$ . Therefore, by setting  $\lambda := \exp\left(-\frac{\varepsilon^2}{2\sigma^2 d^2 T}\right) < 1$ , we have

$$\sum_k \mathbb{P}(\Delta(kT, T) \geq \varepsilon) \leq 2d \sum_k \lambda^{1/\gamma_k} < \infty \quad (\text{B.19})$$

588 by [Assumption 1](#). The Borel-Cantelli Lemma then implies that the following event happens almost  
589 surely:

$$\lim_{k \rightarrow \infty} \Delta(kT; T) \leq \varepsilon. \quad (\text{B.20})$$

590 The proof is finished by noting that, for  $kT \leq t < (k+1)T$ ,

$$\Delta(t; T) \leq 2\Delta(kT; T) + \Delta(kT+T; T) \quad (\text{B.21})$$

591 by triangle inequality. ■

592 **B.2. Proof of [Theorem 1](#).** We are now in a position to present our proof of [Theorem 1](#), which we  
593 restate below for convenience:

594 **Theorem 1.** *Let  $X_n, n = 1, 2, \dots$ , be the sequence of states generated by (RRM), and let  $\mathcal{S}$  be a  
595 strict saddle manifold of  $f$ . Then, under [Assumptions 1–3](#), we have*

$$\mathbb{P}(\text{dist}(\mathcal{S}, X_n) \rightarrow 0 \text{ as } n \rightarrow \infty) = 0 \quad (14)$$

596 where  $\text{dist}(\mathcal{S}, X_n) = \inf_{x \in \mathcal{S}} \text{dist}(x, X_n)$  denotes the (Riemannian) distance of  $X_n$  from  $\mathcal{S}$ .

597 *Proof.* Assume that  $X_n \rightarrow \mathcal{S}$ . We will show that this event has zero probability in a series of steps  
598 which we outline below.

599 **Step 1: Isometrically embedded Robbins–Monro iterates.** Since  $\mathcal{M}$  is assumed to be smooth,  
600 the second Nash embedding theorem [35] implies there exists a smooth and *isometric* embedding  
601  $\iota : \mathcal{M} \rightarrow \mathbb{R}^M$  such that, for all  $x \in \mathcal{M}$  and all  $z, w \in \mathcal{T}_x \mathcal{M}$ , we have

$$\langle z, w \rangle_x = \langle D \iota_x(z), D \iota_x(w) \rangle. \quad (\text{B.22})$$

602 Since  $\iota$  is an embedding, it is surjective. Since it is isometric, it preserves distance and hence must be  
603 one-to-one. Therefore,  $\iota$  is a diffeomorphism since it is also smooth. We can therefore define the  
604 *pushforward* of the vector field  $v$  on  $\mathcal{M}$  to a vector field on the image  $\mathcal{M}^E \subset \mathbb{R}^M$  in the usual way as

$$v_0^E(x^E) := D \iota_x v(x) \quad \text{for all } x^E = \iota(x) \in \mathbb{R}^M. \quad (\text{B.23})$$

605 We also set  $\mathcal{S}^E := \iota(\mathcal{S})$ .

606 By the Tietze extension theorem and the smooth manifold extension lemma [42],  $v_0^E(x^E)$  can be  
607 extended to a Lipschitz continuous vector field on all of  $\mathbb{R}^M$ , which we still denote by  $v_0^E(x^E)$ . To  
608 avoid trivialities, we will also need to ensure that  $v_0^E(x^E)$  is not 0 in a neighborhood of  $\mathcal{S}^E$ : If this is  
609 the case, then we set our target field  $v^E(x^E) := v_0^E(x^E)$ ; otherwise, let  $\mathbf{1}$  denote the vector of 1's in all  
610 coordinates, and define a new vector field  $v^E$  on  $\mathbb{R}^M$  as

$$v^E(x^E) := v_0^E(x^E) + \text{dist}^E(x^E, \mathcal{S}^E)^2 \cdot \mathbf{1} \quad (\text{B.24})$$

611 where  $\text{dist}^E(x^E, \mathcal{S}^E) := \inf_{y^E \in \mathcal{S}^E} \|x^E - y^E\|$ . Obviously, this new vector field agrees with  $v_0^E(x^E)$   
612 on  $\mathcal{M}^E$  and therefore is still the pushforward of  $v$  under  $\iota$ . Moreover, it is not uniformly 0 in a  
613 neighborhood of  $\mathcal{S}^E$ . [It is worth noting that the so-defined vector field  $v^E$  is in general *not* the  
614 (Euclidean) gradient of any function, a fact which presents significant difficulty to our analysis.]

615 **Step 2:  $\mathcal{S}^E$  is an unstable invariant set.** Our next goal is to show that there exists an *unstable*  
616 *neighborhood*  $\mathcal{U}^E$  around  $\mathcal{S}^E$  in the following sense: First, for each  $\hat{x} \in \mathcal{S}$ , consider its image  
617  $\hat{x}^E = \iota(\hat{x}) \in \mathcal{S}^E$ . Since  $v^E$  agrees with the pushforward of  $v \equiv \text{grad} f$  under  $\iota$ , and since  $\iota$  is an  
618 isometry, we have the following relation for all tangent vector  $z \in \mathcal{T}_{\hat{x}}\mathcal{M}$ :

$$\langle D v_{x^E}^E D \iota_{\hat{x}}(z), D \iota_{\hat{x}}(z) \rangle = \langle \text{Hess} f(\hat{x})z, z \rangle_{\hat{x}}. \quad (\text{B.25})$$

619 Since  $\hat{x}$  is a strict saddle point, (B.25) implies that  $\lambda_{\min}(D v_{\hat{x}^E}^E) < -c_- < 0$  for all  $\hat{x}^E \in \mathcal{S}^E$ . By an  
620 established series of arguments [8, 10, 43], using the stable manifold theorem for a strict saddle [60]  
621 and the transversality of the strict saddle manifold [1], there exists a  $(M - m)$ -dimensional embedded  
622 submanifold  $\mathcal{Q}^E$  in  $\mathbb{R}^M$  that contains  $\mathcal{S}^E$ . [Here,  $1 \leq m \leq M$ , and  $M - m$  represents the dimension of  
623 the *unstable manifold* of  $v^E$ .] Moreover, writing  $\Phi^E$  for the flow generated by  $v^E$ , it follows that  $\mathcal{Q}^E$   
624 is locally invariant under  $\Phi^E$ . Hence, there exists a neighborhood  $\mathcal{N}^E$  of  $\mathcal{S}^E$  in  $\mathbb{R}^M$  and a positive  
625 time  $t_0$  such that for all  $|t| \leq t_0$ , the following inclusion holds:

$$\Phi_t^E(\mathcal{N}^E \cap \mathcal{Q}^E) \subset \mathcal{Q}^E. \quad (\text{B.26})$$

626 To proceed, note that  $\mathbb{R}^M$  can be decomposed further as the direct sum of the tangent space to  $\mathcal{Q}^E$  at  
627  $x^E$ , denoted by  $\mathcal{T}_{x^E}\mathcal{Q}^E$ , and an additional complementary subspace denoted by  $\mathcal{E}_{x^E}^u$ :

$$\mathbb{R}^M = \mathcal{T}_{x^E}\mathcal{Q}^E \oplus \mathcal{E}_{x^E}^u. \quad (\text{B.27})$$

628 The mapping  $x^E \rightarrow \mathcal{E}_{x^E}^u$  is continuous, where  $x^E$  varies over  $\mathcal{S}^E$  and  $\mathcal{E}_{x^E}^u$  belongs to the Grassmanian  
629 manifold  $G(m, M)$ . It is important to note that  $\mathcal{E}_{x^E}^u$  contains at least one direction in  $\mathcal{T}_{x^E}\mathcal{M}^E$  due to  
630 (B.25). Then, for all  $t \in \mathbb{R}$  and  $x \in \mathcal{S}^E$ , the Jacobian of  $\Phi_t^E$  evaluated at  $x^E$  maps  $\mathcal{E}_{x^E}^u$  to  $\mathcal{E}_{\Phi_t^E(x^E)}^u$ , i.e.,

$$D \Phi_t^E(x^E) \mathcal{E}_{x^E}^u = \mathcal{E}_{\Phi_t^E(x^E)}^u. \quad (\text{B.28})$$

631 Finally, and most importantly, we have the following characterization that formalizes the idea that *all*  
632 *directions in the unstable manifold should diverge under  $\Phi_t^E$* : There exist positive constants  $c$  and  $C$   
633 such that for all  $x^E \in \mathcal{S}^E$ ,  $w^E \in \mathcal{E}_{x^E}^u$ , and  $t \geq 0$ , the following inequality holds:

$$\|D \Phi_t^E(x^E) w^E\| \geq C e^{ct} \|w^E\|. \quad (\text{B.29})$$

634 The above verifies all the conditions for a *unstable invariant set* for  $\mathcal{S}^E$  in the sense of Benaïm [8]. A  
635 deep result by Benaïm and Hirsch [9] then asserts the existence of a *local Lyapunov function* near a  
636 neighborhood of  $\mathcal{S}^E$ , whose construction we outline below.

637 **Step 3: Local Lyapunov function  $\eta^E$ .** For a right-differentiable function  $\eta^E: \mathbb{R}^M \rightarrow \mathbb{R}$  we define  
638 its right derivative  $D \eta^E$  applied to a vector  $h^E \in \mathbb{R}^M$  by

$$D \eta^E(x^E) h^E = \lim_{t \rightarrow 0^+} \frac{\eta^E(x^E + t h^E) - \eta^E(x^E)}{t}. \quad (\text{B.30})$$

639 If  $\eta^E$  is differentiable, then (B.30) is simply  $\langle \nabla \eta^E(x^E), h^E \rangle$ . In view of all this, Benaïm [8] provides  
640 the following crucial result:

641 **Proposition B.1** (Benaïm, 1999, Prop. 9.5). *There exists a compact neighborhood  $\mathcal{U}^E(\mathcal{S}^E)$  of  $\mathcal{S}^E$ ,  
642 positive numbers  $l, \beta > 0$ , and a map  $\eta^E: \mathcal{U}^E(\mathcal{S}^E) \rightarrow \mathbb{R}^+$  such that  $\eta^E(x^E) = 0$  if and only if  
643  $x^E \in \mathcal{Q}^E$ , and the following holds:*

- 644 (i)  $\eta^E$  is  $C^2$  on  $\mathcal{U}^E(\mathcal{S}^E) \setminus \mathcal{Q}^E$ .
- 645 (ii) For all  $x^E \in \mathcal{U}^E(\mathcal{S}^E) \cap \mathcal{Q}^E$ ,  $\eta^E$  admits a right derivative  $D \eta^E(x^E): \mathbb{R}^M \rightarrow \mathbb{R}^M$  which is  
646 Lipschitz, convex and positively homogeneous.
- 647 (iii) There exists  $k > 0$  and a neighborhood  $\mathcal{W}^E \subset \mathbb{R}^M$  of 0 such that for all  $x^E \in \mathcal{U}^E(\mathcal{S}^E)$  and  
648  $z^E \in \mathcal{W}^E$ ,

$$\eta^E(x^E + z^E) \geq \eta^E(x^E) + D \eta^E(x^E) z^E - k \|z^E\|^2. \quad (\text{B.31})$$

- 649 (iv) There exists  $c_1 > 0$  such that for all  $x^E \in \mathcal{U}^E(\mathcal{S}^E) \setminus \mathcal{Q}^E$

$$\|\Pi_{\mathcal{M}^E}(D \eta^E(x^E))\| \geq c_1 \quad (\text{B.32})$$



650 where  $\Pi_{\mathcal{M}^E}$  is the projection on  $\mathcal{M}^E$ .<sup>1</sup> In addition, for all  $x^E \in \mathcal{U}^E(\mathcal{S}^E) \cap \mathcal{Q}^E$  and  $z^E \in \mathbb{R}^M$

$$\langle D\eta^E(x^E), z^E \rangle \geq c_1 \|z^E - D\Pi(x^E)z^E\| \quad (\text{B.33})$$

651 where  $\Pi$  is the projection of a neighborhood of  $\mathcal{S}^E$  onto  $\mathcal{Q}^E$ .

652 (v) For all  $x^E \in \mathcal{U}^E(\mathcal{S}^E) \cap \mathcal{Q}^E$ ,  $w^E \in \mathcal{T}_{x^E} \mathcal{Q}^E$  and  $z^E \in \mathbb{R}^M$ ,

$$D\eta^E(x^E)(w^E + z^E) = D\eta^E(x^E)z^E. \quad (\text{B.34})$$

653 (vi) For all  $x^E \in \mathcal{U}^E(\mathcal{S}^E)$  we have

$$D\eta^E(x)v^E(x^E) \geq \beta\eta^E(x^E). \quad (\text{B.35})$$

654 The function  $\eta^E$  will serve as a local “energy function” that plays an instrumental role in our analysis;  
655 the well-posedness of  $\Pi$  is guaranteed by [25, Chap 4].

656 **Step 4: Geodesic offset.** Consider the image of an RRM scheme  $X_n^E := \iota(X_n)$ . If  $X_n^E \notin \mathcal{U}^E(\mathcal{S}^E)$   
657 for all  $n$ , then there is nothing to prove. Otherwise, without loss of generality we may assume that  
658  $X_1^E \in \mathcal{U}^E(\mathcal{S}^E)$ . Accordingly, define the first exit time  $T$  from  $\mathcal{U}^E(\mathcal{S}^E)$  as

$$T := \inf\{k \geq 1 : X_k^E \notin \mathcal{U}^E(\mathcal{S}^E)\}. \quad (\text{B.36})$$

659 Evidently,  $T$  is a stopping time adaptive to  $\mathcal{F}_n$ , so it suffices to show that<sup>2</sup>

$$\mathbb{P}(T = \infty) = 0. \quad (\text{B.37})$$

660 To this end, a notion that plays a central role in our analysis is the *geodesic offset*, defined as follows.  
661 Define the pushforward of the respective noise and bias vectors in the RRM scheme  $X_n$  by

$$U_n^E := D\iota_{x_n} U_n, \quad b_n^E := D\iota_{x_n} b_n. \quad (\text{B.38})$$

662 It is important to remember that  $U_n^E \in \mathcal{T}_{X_n^E} \mathcal{M}^E$ , a fact that we will use freely in the sequel.

663 We now formally define the *geodesic offset*  $\Delta(x; z) \in \mathbb{R}^M$  as, for any  $x \in \mathcal{M}$  and  $z \in \mathcal{T}_x \mathcal{M}$ ,

$$\Delta(x; z) := \iota(\exp_x(z)) - \iota(x) - D\iota_x(z). \quad (\text{B.39})$$

664 By [Assumption 3](#), there exists  $\varrho > 0$  such that, for all  $\|z\|_x < \varrho$ , the exponential mapping is the  
665 unique minimizing geodesic. Furthermore, for all such  $z$ 's, define the curve  $\gamma^E(t) := \iota(x) + tD\iota_x(z)$ ,  
666 then

$$\gamma^E(0) = \iota(x), \quad \dot{\gamma}^E(0) = D\iota_x(z) \quad (\text{B.40})$$

667 so that  $\gamma^E(t)$  agrees with the image of the geodesics  $\iota(\exp_x(tz))$ . As a result, for any  $\|z\|_x < \varrho$ , we  
668 have  $\Delta(x; z) = \mathcal{O}(\|z\|_x^2)$ . Now, setting  $x \leftarrow X_n$  and  $z \leftarrow \gamma_n(v(X_n) + U_n + b_n)$ , we have

$$X_{n+1}^E = X_n^E + \gamma_n(v^E(X_n^E) + U_n^E + b_n^E) + \epsilon_n^E \quad (\text{B.41})$$

669 where  $\epsilon_n^E := \Delta(X_n; \gamma_n(v(X_n) + U_n + b_n))$ . By [Assumption 2](#), we know that  $U_n^E + b_n^E = \mathcal{O}(1)$  almost  
670 surely. Moreover, since  $v$  is smooth, on the event  $T = \infty$ ,  $X_n^E \in \mathcal{U}^E(\mathcal{S}^E)$  for all  $n$  and therefore  
671  $\sup_{n \geq 1} \|v^E(X_n^E)\| < \infty$ . Since  $\gamma_n \rightarrow 0$ , for any  $n$  large enough, we get

$$\epsilon_n^E = \mathcal{O}(\gamma_n^2). \quad (\text{B.42})$$

672 Now, define two sequences of random variables  $\{Y_n\}_{n \geq 1}$  and  $\{S_n\}_{n \geq 1}$  as

$$Y_{n+1} = (\eta^E(X_{n+1}^E) - \eta^E(X_n^E)) \mathbb{1}_{\{n \leq T\}} + \gamma_n \mathbb{1}_{\{n > T\}}, \quad (\text{B.43a})$$

$$S_0 = \eta^E(X_0^E), \quad S_n = S_0 + \sum_{k=1}^n Y_k. \quad (\text{B.43b})$$

673 The importance of these sequences is that the event  $\{T = \infty\}$  is contained in the event  $\{S_n \rightarrow 0\}$ . To  
674 see this, assume  $T = \infty$ . Then we have  $Y_{n+1} = \eta^E(X_{n+1}^E) - \eta^E(X_n^E)$  and  $S_n = \eta^E(X_n)$  by [Eqs. \(B.43a\)](#)  
675 and [\(B.43b\)](#). In addition, since  $\{X_n^E\}$  remains in  $\mathcal{U}^E(\mathcal{S}^E)$  by definition of the stopping time  $T$ ,  
676 [Theorem 2](#) combined with [8, Theorem 5.7] asserts that the limit set  $L(\{X_n^E\})$  of  $\{X_n^E\}$  is a nonempty  
677 compact invariant subset of  $\mathcal{U}^E(\mathcal{S}^E)$ , so that for all  $y^E \in L(\{X_n^E\})$  and  $t \in \mathbb{R}$ ,  $\Phi_t^E(y^E) \in \mathcal{U}^E(\mathcal{S}^E)$ .  
678 But then [Proposition B.1\(vi\)](#) implies that  $\eta^E(\Phi_t^E(y^E)) \geq e^{\beta t} \eta^E(y^E)$  for all  $t > 0$ , forcing  $\eta^E(y^E)$   
679 to be zero. Since  $\eta^E(x^E) = 0$  if and only if  $x^E \in \mathcal{Q}^E$ , we have  $L(\{X_n^E\}) \subset \mathcal{Q}^E$ , which implies  
680  $S_n = \eta^E(X_n^E) \rightarrow 0$ .

681 Therefore, the rest of the proof is devoted to showing that  $\mathbb{P}(\lim_{n \rightarrow \infty} S_n = 0) = 0$ .

<sup>1</sup>The original statement in [8] is  $\|D\eta^E(x^E)\| \geq c_1$ . The inequality in [\(B.32\)](#) is obtained via the same proof  
and noting that  $\mathcal{E}_{x^E}^u$  contains at least one direction in  $\mathcal{T}_{x^E} \mathcal{M}^E$ .

<sup>2</sup>[Theorem 1](#) follows from [\(B.37\)](#) because the event  $\{\text{dist}(X_n, \mathcal{S}) \rightarrow 0\}$  is contained in  $\{T = \infty\}$ .

682 **Step 5: Probabilistic estimates.** To this end, we will need two technical lemmas, originally due to  
683 Pemantle [52], and extended to their current form by Benaïm and Hirsch [10].

684 **Lemma B.1.** Let  $S_n$  be a nonnegative stochastic process,  $S_n = S_0 + \sum_{k=1}^n Y_k$  where  $Y_n$  is  $\mathcal{F}_n$ -  
685 measurable. Let  $\alpha_n := \sum_{k=n}^{\infty} \gamma_k^2$ . Assume there exist a sequence  $0 \leq \varepsilon_n = o(\sqrt{\alpha_n})$ , constants  
686  $a_1, a_2 > 0$  and an integer  $N_0$  such that for all  $n \geq N_0$ ,

- 687 (i)  $|Y_n| = o(\sqrt{\alpha_n})$ .
- 688 (ii)  $\mathbb{1}_{\{S_n > \varepsilon_n\}} \mathbb{E}[Y_{n+1} | \mathcal{F}_n] \geq 0$ .
- 689 (iii)  $\mathbb{E}[S_{n+1}^2 - S_n^2 | \mathcal{F}_n] \geq a_1 \gamma_n^2$ .
- 690 (iv)  $\mathbb{E}[Y_{n+1}^2 | \mathcal{F}_n] \leq a_2 \gamma_n^2$ .

691 Then  $\mathbb{P}(\lim_{n \rightarrow \infty} S_n = 0) = 0$ .

692 **Lemma B.2.** Let  $S_n$  be a nonnegative stochastic process,  $S_n = S_0 + \sum_{k=1}^n Y_k$  where  $Y_n$  is  $\mathcal{F}_n$ -  
693 measurable and  $|Y_n| \leq C$  almost surely for some constant  $C$ . Assume that  $\sum_n \gamma_n^2 = \infty$ , and there  
694 exists  $c > 0, N' \in \mathbb{N}$  such that for all  $n \geq N'$ ,

$$\mathbb{E}[S_{n+1}^2 - S_n^2 | \mathcal{F}_n] \geq c \gamma_n^2. \quad (\text{B.44})$$

695 Then

$$\mathbb{P}\left(\lim_{n \rightarrow \infty} S_n = 0\right) = 0. \quad (\text{B.45})$$

696 Our proof will be concluded by verifying all the premises of [Lemmas B.1–B.2](#). To that end, note first  
697 that the sequence  $S_n$  defined in [\(B.43b\)](#) is nonnegative by construction. We will then separate the  
698 analysis into two cases:

699 **Case 1.** Square-summable step-sizes, i.e.,  $\sum_n \gamma_n^2 < \infty$ . In this case, we have

$$\lim_{n \rightarrow \infty} \frac{\gamma_n}{\sqrt{\sum_{k=n}^{\infty} \gamma_k^2}} = 0 \quad (\text{B.46})$$

700 so  $\gamma_n = o\left(\sqrt{\sum_{k=n}^{\infty} \gamma_k^2}\right)$ . This fact will be used in the proof when we invoke [Lemma B.1](#) below  
701 with  $\varepsilon_n = \mathcal{O}(\gamma_n)$  and  $\alpha_n = \sum_{k=n}^{\infty} \gamma_k^2$  therein. The verification process then proceeds as follows:

702 • **Verifying [Lemma B.1\(i\)](#) and [\(iv\)](#):** By the Lipschitz continuity of  $\eta^E$ , we know that

$$\begin{aligned} \|\eta^E X_n^E - \eta^E X_{n+1}^E\| &\leq L' \|X_n^E - X_{n+1}^E\| \\ &= \gamma_n \|v^E(X_n^E) + U_n^E + b_n^E\| \end{aligned} \quad (\text{B.47})$$

703 where  $L'$  is the Lipschitz constant of  $\eta^E$ . We have seen in the analysis of [\(B.42\)](#) that  $\|v^E(X_n^E) +$   
704  $U_n^E + b_n^E\| = \mathcal{O}(1)$  almost surely by [Assumption 2](#) on the event  $T = \infty$ . Therefore,  $|Y_{n+1}| =$   
705  $\mathcal{O}(\gamma_n) = o(\sqrt{\alpha_n})$  which implies both [Lemma B.1\(i\)](#) and [\(iv\)](#).

706 • **Verifying [Lemma B.1\(ii\)](#):** Let  $k' = k\|v^E\| + \sigma$  where  $k$  is given by [Proposition B.1\(iii\)](#) and  
707  $\|v^E\| := \sup\{v^E(x^E) : x^E \in \mathcal{U}^E(\mathcal{S}^E)\}$  and  $\sigma$  is the uniform bound of  $U_n$ . If  $n \leq T$ , using  
708 [Proposition B.1\(ii\)](#), [\(iii\)](#), [\(v\)](#) and [\(vi\)](#) we have

$$\begin{aligned} \eta^E(X_{n+1}^E) - \eta^E(X_n^E) &\geq \gamma_n \mathbb{D} \eta^E(X_n^E) (v^E(X_n^E) + U_n^E + b_n^E) \\ &\quad + \mathbb{D} \eta^E(X_n^E) \varepsilon_n^E - k \gamma_n^2 (\|v^E\| + \|U_n^E\| + \|b_n^E\|)^2 \\ &\geq \gamma_n \beta \eta^E(X_n^E) + \gamma_n \mathbb{D} \eta^E(X_n^E) U_n^E + \gamma_n \mathbb{D} \eta^E(X_n^E) b_n^E \\ &\quad + \mathbb{D} \eta^E(X_n^E) \varepsilon_n^E - 2k' \gamma_n^2 - 2k \gamma_n^2 \|b_n^E\|^2. \end{aligned} \quad (\text{B.48})$$

709 By [Assumption 2](#), there exists a constant  $c' > 0$  such that  $-\|b_n^E\| \geq -c' \gamma_n$  (a.s.). Combining  
710 this with the Lipschitz continuity of  $\eta^E$  and [\(B.42\)](#), we can merge the last four terms in [\(B.48\)](#)  
711 as

$$\eta^E(X_{n+1}^E) - \eta^E(X_n^E) \geq \gamma_n \beta \eta^E(X_n^E) + \gamma_n \mathbb{D} \eta^E(X_n^E) U_n^E - 2k'' \gamma_n^2 \quad (\text{B.49})$$

712 for some constant  $k'' > 0$ . We thus get

$$\mathbb{1}_{\{n \leq T\}} \mathbb{E}[Y_{n+1} | \mathcal{F}_n] \geq \mathbb{1}_{\{n \leq T\}} \left[ \gamma_n \beta \eta^E(X_n^E) - 2k'' \gamma_n^2 + \gamma_n \mathbb{E}[\mathbb{D} \eta^E(X_n^E) U_n^E | \mathcal{F}_n] \right]. \quad (\text{B.50})$$

713 By [Proposition B.1\(ii\)](#) again, we have

$$\begin{aligned} \mathbb{E}[\mathsf{D}\eta^E(X_n^E)U_n^E|\mathcal{F}_n] &\geq \mathsf{D}\eta^E(X_n^E)\mathbb{E}[U_n^E|\mathcal{F}_n] = 0 \\ &= \mathsf{D}\eta^E(X_n^E)\mathbb{E}[\mathsf{D}\iota_{x_n}U_n|\mathcal{F}_n] = 0 \end{aligned} \quad (\text{B.51})$$

714 since we have assumed the noise to be zero mean. Combining [\(B.50\)](#) and [\(B.51\)](#), we then get

$$\mathbb{1}_{\{n \leq T\}} \mathbb{E}[Y_{n+1}|\mathcal{F}_n] \geq \mathbb{1}_{\{n \leq T\}} [\gamma_n \beta \eta^E(X_n^E) - 2k''\gamma_n^2]. \quad (\text{B.52})$$

715 If  $n > T$ ,  $Y_{n+1} = \gamma_n$  so trivially

$$\mathbb{1}_{\{n \leq T\}} \mathbb{E}[Y_{n+1}|\mathcal{F}_n] \geq 0. \quad (\text{B.53})$$

716 Combining [\(B.52\)](#) with [\(B.53\)](#), we see that [Lemma B.1\(ii\)](#) is satisfied with  $\varepsilon_n = \frac{k''}{\beta}\gamma_n$ .

717 • **Verifying [Lemma B.1\(iii\)](#):** We begin by observing that

$$\mathbb{E}[S_{n+1}^2 - S_n^2|\mathcal{F}_n] = \mathbb{E}[Y_{n+1}^2|\mathcal{F}_n] + 2S_n \mathbb{E}[Y_{n+1}|\mathcal{F}_n]. \quad (\text{B.54})$$

718 If  $S_n \geq \varepsilon_n$ , then the last term on the right-hand side of [\(B.54\)](#) is non-negative by [Lemma B.1\(ii\)](#)  
719 that we just verified above. If  $S_n < \varepsilon_n$ , [\(B.52\)](#) with [\(B.53\)](#) imply that  $S_n \mathbb{E}[Y_{n+1}|\mathcal{F}_n] \geq$   
720  $-\varepsilon_n k''\gamma_n^2 = -\mathcal{O}(\gamma_n^3)$ . In other words, [\(B.54\)](#) can be rewritten as

$$\mathbb{E}[S_{n+1}^2 - S_n^2|\mathcal{F}_n] \geq \mathbb{E}[Y_{n+1}^2|\mathcal{F}_n] - \mathcal{O}(\gamma_n^3). \quad (\text{B.55})$$

721 Below, we shall prove that  $\mathbb{E}[Y_{n+1}^2|\mathcal{F}_n] \geq b_1\gamma_n^2$  for some  $b_1 > 0$  and  $n$  large enough. Combin-  
722 ing this with [\(B.55\)](#) proves [Lemma B.1\(iii\)](#).

723 From [\(B.49\)](#), we deduce

$$\mathbb{1}_{\{n \leq T\}} \left[ \mathbb{E}[(Y_{n+1})_+|\mathcal{F}_n] - \left( \gamma_n \mathbb{E}[(\mathsf{D}\eta^E(X_n^E)U_n^E)_+|\mathcal{F}_n] - k''\gamma_n^2 \right) \right] \geq 0. \quad (\text{B.56})$$

724 We now claim that

$$\mathbb{1}_{\{n \leq T\} \cap \{X_n^E \notin \mathcal{Q}^E\}} \left( \mathbb{E}[(\mathsf{D}\eta^E(X_n^E)U_n^E)_+|\mathcal{F}_n] \right) \geq c_1\zeta. \quad (\text{B.57})$$

725 where  $c_1$  is given by [Proposition B.1\(iv\)](#) and  $\zeta$  is defined in [Assumption 2](#). To see this, recall  
726 that  $\|U_n\|_{x_n} < \sigma$  by [Assumption 2](#). Moreover, we have  $X_n^E \in \mathcal{U}^E(\mathcal{S}^E)$  on the event  $T = \infty$ .  
727 [Proposition B.1\(i\)](#) then implies  $\eta^E$  is differentiable on  $\mathcal{U}^E(\mathcal{S}^E) \setminus \mathcal{Q}^E$ , and [Proposition B.1\(iv\)](#)  
728 further shows that

$$\begin{aligned} &\mathbb{1}_{\{n \leq T\} \cap \{X_n^E \notin \mathcal{Q}^E\}} \left( \mathbb{E}[(\mathsf{D}\eta^E(X_n^E)U_n^E)_+|\mathcal{F}_n] \right) \\ &= \mathbb{1}_{\{n \leq T\} \cap \{X_n^E \notin \mathcal{Q}^E\}} \left( \mathbb{E}[\langle \eta^E(X_n^E), U_n^E \rangle_+|\mathcal{F}_n] \right) \\ &= \mathbb{1}_{\{n \leq T\} \cap \{X_n^E \notin \mathcal{Q}^E\}} \left( \mathbb{E}[\langle \Pi_{\mathcal{T}_{X_n^E} \mathcal{M}^E}(\eta^E(X_n^E)), U_n^E \rangle_+|\mathcal{F}_n] \right) \\ &\geq c_1\zeta \end{aligned} \quad (\text{B.58})$$

729 where we have used the fact that  $U_n^E \in \mathcal{T}_{X_n^E} \mathcal{M}^E$  and [Assumption 2](#).

730 If  $X_n^E \in \mathcal{Q}^E$ , we can choose a unit vector  $v_n^E \in \ker(I - \mathsf{D}\Pi(X_n^E))^\perp \cap \mathcal{T}_{X_n^E} \mathcal{M}^E$  where  $\Pi$  denotes  
731 the projection operator onto  $\mathcal{Q}^E$ ; note that  $v_n^E \in \ker(I - \mathsf{D}\Pi(X_n^E))^\perp \cap \mathcal{T}_{X_n^E} \mathcal{M}^E \neq \emptyset$  since  
732  $\mathcal{E}_{x^E}^u$  contains at least one direction in  $\mathcal{T}_{x^E} \mathcal{M}^E$  for all  $x^E \in \mathcal{U}^E(\mathcal{S}^E) \cap \mathcal{M}^E$ . By the definition  
733 of  $v_n^E$ , we have  $\langle U_n^E, v_n^E \rangle = \langle U_n^E - \mathsf{D}\Pi(X_n^E)U_n^E, v_n^E \rangle$ . Let  $\mathcal{H} = \{n \leq T\} \cap \{X_n^E \in \mathcal{Q}^E\}$ . By  
734 [Proposition B.1\(iv\)](#), Cauchy-Schwartz, and [Assumption 2](#), we get

$$\begin{aligned} \mathbb{1}_{\mathcal{H}} \mathbb{E}[\langle \mathsf{D}\eta^E(X_n^E)U_n^E \rangle_+|\mathcal{F}_n] &\geq c_1 \mathbb{1}_{\mathcal{H}} \mathbb{E}[\|U_n^E - \mathsf{D}\Pi(X_n^E)U_n^E\|_+|\mathcal{F}_n] \\ &\geq c_1 \mathbb{1}_{\mathcal{H}} \mathbb{E}[\langle U_n^E - \mathsf{D}\Pi(X_n^E)U_n^E, v_n^E \rangle_+|\mathcal{F}_n] \\ &= c_1 \mathbb{1}_{\mathcal{H}} \mathbb{E}[\langle U_n^E, v_n^E \rangle_+|\mathcal{F}_n] \\ &= c_1 \mathbb{1}_{\mathcal{H}} \mathbb{E}[\langle U_n, v_n \rangle_{x_n} |_+|\mathcal{F}_n] \end{aligned} \quad (\text{B.59})$$

735 where  $v_n$  is the pullback of  $v_n^E$  under  $\iota$ . Since  $\iota$  is an isometry, the pullback preserves the inner  
736 product, and therefore

$$\mathbb{1}_{\mathcal{H}} \mathbb{E}[\langle \mathsf{D}\eta^E(X_n^E)U_n^E \rangle_+|\mathcal{F}_n] \geq c_1\zeta \mathbb{1}_{\mathcal{H}} \quad (\text{B.60})$$

737 by [Assumption 2](#). Combining [Eqs. \(B.53\), \(B.56\) and \(B.60\)](#) and [Item Case 1](#), then gives

$$\mathbb{E}[[Y_{n+1}]_+ | \mathcal{F}_n] \geq c_1 \zeta \gamma_n - k'' \gamma_n^2. \quad (\text{B.61})$$

738 On the other hand, we always have  $\mathbb{E}[Y_{n+1}^2 | \mathcal{F}_n] \geq \mathbb{E}[[Y_{n+1}]_+ | \mathcal{F}_n]^2$  by Jensen. It then follows  
739 that  $\mathbb{E}[Y_{n+1}^2 | \mathcal{F}_n] \geq b_1 \gamma_n^2$  for some  $b_1 > 0$  and large enough  $n$  as desired.

740 We have now verified conditions (i)–(iv) in [Lemma B.1](#). Thus, [Lemma B.1](#) concludes that

$$\mathbb{P}(\lim_{n \rightarrow \infty} S_n = 0) = 0 \quad (\text{B.62})$$

741 which finishes the proof for the case of  $\sum_n \gamma_n^2 < \infty$ .

742 **Case 2.** When  $\sum_n \gamma_n^2 = \infty$ , the same proof above shows that  $\mathbb{E}[Y_{n+1}^2 | \mathcal{F}_n] \geq b_1 \gamma_n^2$  for some  $b_1 > 0$   
743 and large enough  $n$ . Combining this with [\(B.55\)](#) yields

$$\mathbb{E}[S_{n+1}^2 - S_n^2 | \mathcal{F}_n] \geq c \gamma_n^2 \quad (\text{B.63})$$

744 for some  $c > 0$ . [Lemma B.2](#) then concludes:

$$\mathbb{P}(\lim_{n \rightarrow \infty} S_n = 0) = 0$$

745 as claimed. ■

746 **B.3. Proof of [Proposition 1](#).** We conclude this appendix with the application of [Theorem 1](#) to  
747 [Algorithms 1–5](#) under the explicit oracle assumptions of [Proposition 1](#). For convenience, we restate  
748 the relevant result below:

749 **Proposition 1.** *Suppose that [Algorithms 1–5](#) are run with a gradient oracle  $V(x; \theta) = v(x) + \text{err}(x; \theta)$   
750 such that*

$$\|\text{err}(x; \theta)\|_x \leq \sigma(x) \quad \text{and} \quad \mathbb{E}[[\langle \text{err}(x; \theta), z \rangle_x]_+] \geq \zeta(x) \quad (17)$$

751 for all  $z \in \mathcal{T}_x \mathcal{M}$ ,  $\|z\|_x = 1$ , and for suitable functions  $\zeta, \sigma: \mathcal{M} \rightarrow \mathbb{R}_+$  with  $\sigma$  bounded on bounded  
752 subsets of  $\mathcal{M}$  and  $\inf_x \zeta(x) > 0$ . Then, under [Assumptions 1 and 3](#), the conclusion of [Theorem 1](#)  
753 holds, that is, [Algorithms 1–5](#) avoid strict saddle manifolds of  $f$ .

754 *Remark.* In addition to the claimed [Algorithms 1–5](#), we will further prove the same conclusion for  
755 the two algorithms considered in [Appendix A](#).

756 *Proof.* By [Theorem 1](#), it suffices to verify [Assumption 2](#) under (17) and the event  $\text{dist}(X_n, \mathcal{S}) \rightarrow 0$ .  
757 We proceed method by method.

758 **Algorithm 1.** Since  $b_n = 0$  in [Algorithm 1](#), [Assumption 2](#) holds trivially by (17).

759 **Algorithms 2, 3 and 5.** By definition,  $\mathcal{R}_x(z)$  is a smooth map and hence satisfies  $\lim_{z \rightarrow 0} \mathcal{R}_x(z) = x$ .  
760 On the event  $\text{dist}(X_n, \mathcal{S}) \rightarrow 0$ , we have  $v(X_n) + U_n + b_n = \mathcal{O}(1)$ , and therefore  $X_{n+1}$  lies in the  
761 injectivity radius of  $X_n$  with probability 1 for  $n$  large enough. As a result, the mapping  $\log_{X_n}(X_{n+1})$   
762 is well-define for all  $n$  large enough.

763 We first consider [Algorithms 2](#) and [5](#) whose proofs are identical since they are both are the form:

$$X_{n+1} = \mathcal{R}_{X_n}(\gamma_n V(X_n; \theta_n)). \quad (\text{B.64})$$

764 Let  $\tilde{v}_n \in \mathcal{T}_{X_n} \mathcal{M}$  be the vector such that  $\exp_{X_n}(\gamma_n \tilde{v}_n) = X_{n+1}$ , i.e.,

$$\gamma_n \tilde{v}_n = \log_{X_n} \left( \mathcal{R}_{X_n}(\gamma_n V(X_n; \theta_n)) \right). \quad (\text{B.65})$$

765 Then (B.64) is an RRM scheme with  $W_n = \tilde{v}_n - v(X_n)$  where  $\tilde{v}_n$  is defined in (B.65). Consider the  
766 curve  $c(t) := \mathcal{R}_{X_n}(tV(X_n; \theta_n))$ . By (17), on the event  $\text{dist}(X_n, \mathcal{S}) \rightarrow 0$ , the curve  $c(t)$  lies in the  
767 injectivity radius of  $X_n$  almost surely for all  $t \in [0, \gamma_n]$  and all  $n$  large enough. Let  $\hat{c}(t)$  be the smooth  
768 curve of  $c(t)$  in the normal coordinate with base  $X_n$  and an arbitrary orthonormal frame, and let  $\hat{X}_{n+1}$   
769 be the normal coordinate of  $X_{n+1}$ . Also, let  $\tilde{v}_n^N$  be the (Euclidean) vector of  $\tilde{v}_n$  expanded in the chosen  
770 orthonormal basis, and define  $V^N(X_n; \theta_n)$  and  $\text{err}^N(X_n; \theta_n)$  similarly. By definition,  $\hat{X}_{n+1}$  is nothing  
771 but  $\gamma_n \tilde{v}_n^N$ . In addition, by (17), we have

$$\|\text{err}^N(X_n; \theta_n)\| = \|\text{err}(X_n; \theta_n)\|_{x_n} \leq \sigma \quad (\text{B.66})$$

772 for some  $\sigma < \infty$ .

773 Since  $X_n = c(0)$  and  $X_{n+1} = c(\gamma_n)$ , by properties of a retraction map we must have

$$\begin{aligned}
\gamma_n \tilde{v}_n^N &= \hat{c}(\gamma_n) \\
&= \hat{c}(0) + \gamma_n \dot{\hat{c}}(0) + \mathcal{O}\left(\gamma_n^2 \|\dot{\hat{c}}(0)\|_2^2\right) \\
&= \gamma_n V^N(X_n; \theta_n) + \mathcal{O}\left(\gamma_n^2 \|V(X_n; \theta_n)\|_{x_n}^2\right) \\
&=: \gamma_n V^N(X_n; \theta_n) + \gamma_n \tilde{b}_n
\end{aligned} \tag{B.67}$$

774 where  $\tilde{b}_n = \mathcal{O}(\gamma_n \|V(X_n; \theta_n)\|_{x_n}^2) = \mathcal{O}(\gamma_n)$ . Therefore,

$$\|b_n\|_{x_n} = \|\mathbb{E}[W_n | \mathcal{F}_n]\|_{x_n} = \|\mathbb{E}[\tilde{b}_n | \mathcal{F}_n]\| = \mathcal{O}(\gamma_n) \tag{B.68}$$

775 which proves the condition for  $b_n$  in [Assumption 2](#). On the other hand, [\(B.67\)](#) shows that

$$\begin{aligned}
\|U_n\|_{x_n} &\leq \|V^N(X_n; \theta_n) + \tilde{b}_n\| + \|\mathbb{E}[V^N(X_n; \theta_n) + \tilde{b}_n]\| \\
&= \mathcal{O}(1)
\end{aligned}$$

776 since  $\|V^N(X_n; \theta_n)\| = \mathcal{O}(1)$  by [\(17\)](#) and  $\tilde{b}_n = \mathcal{O}(\gamma_n)$ . Finally, for any unit vector  $z \in \mathcal{T}_{X_n} \mathcal{M}$ , [\(B.67\)](#)  
777 implies

$$\begin{aligned}
\mathbb{E}[\langle z, U_n \rangle_{x_n}]_+ &\geq \mathbb{E}[\langle z, \text{err}(X_n; \theta_n) \rangle_{x_n}]_+ - \|\tilde{b}_n\| \\
&= \mathbb{E}[\langle z, \text{err}(X_n; \theta_n) \rangle_{x_n}]_+ - \mathcal{O}(\gamma_n).
\end{aligned} \tag{B.69}$$

778 Since  $\gamma_n \rightarrow 0$ , this finishes the proof of [Algorithms 2](#) and [5](#). For [Algorithm 3](#), an Euclidean oracle of  
779 the form [\(17\)](#) translates to a Riemannian oracle with  $\text{err}'(x; \theta) := \nabla^2 h(x)^{-1} \text{err}(x; \theta)$ . It then suffices  
780 to note that, on the event  $\text{dist}(X_n, \mathcal{S}) \rightarrow 0$ ,  $\nabla^2 h(X_n)$  is both upper and lower bounded.

781 **Algorithms 4, 6 and 7.** For [\(RSEG\)](#),  $U_n = \Gamma_{x_n^+ \rightarrow x_n}(\text{err}(X_n^+; \theta_n^+))$  so

$$\|U_n\|_{x_n} = \|\text{err}(X_n^+; \theta_n^+)\|_{x_n^+} \leq \sigma \tag{B.70}$$

782 by [\(17\)](#) and the fact that the parallel transport map is a linear isometry. For the bias term, the definition  
783 of [\(RSEG\)](#) yields

$$\|b_n\| = \|\Gamma_{x_n^+ \rightarrow x_n}(v(X_n^+)) - v(X_n)\|_{x_n} \leq L \text{dist}(X_n^+, X_n) = \gamma_n L \|V(X_n; \theta_n)\|_{x_n} = \mathcal{O}(1) \tag{B.71}$$

784 by the same argument as for [Algorithms 2, 3](#) and [5](#).

785 For [\(ROG\)](#), we have  $U_n = \Gamma_{x_n^+ \rightarrow x_n}(\text{err}(X_n; \theta_n^+))$  and  $b_n = \Gamma_{x_n^+ \rightarrow x_n}(v(X_n^+)) - v(X_n)$ , so [Assumption 2](#)  
786 can be checked exactly as in the case of [Algorithm 7](#) above. The analysis for [Algorithm 6](#) is similar  
787 so we omit the details. ■
